# Supplementary material for: HiC-bench: comprehensive and reproducible Hi-C data analysis designed for parameter exploration and benchmarking
Source: PubMed Central journal article supplement (PMC5217551; doi:10.1186/s12864-016-3387-6), 2017-01-05
Supplement: 12864_2016_3387_MOESM1_ESM.pdf [file 12864_2016_3387_MOESM1_ESM.pdf]

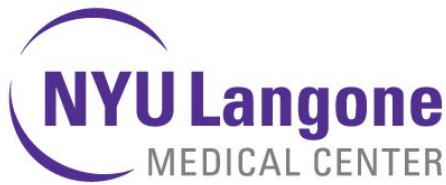

# HiC-Bench Manual

Stephen M. Kelly<sup>1,2</sup>, Charalampos Lazaris<sup>3,4,5</sup>, Aristotelis Tsirigos<sup>1,2,3,4,5</sup>

<sup>1</sup> Applied Bioinformatics Center, Office of Collaborative Science, NYU School of Medicine, NY 10016, USA

<sup>2</sup> Genome Technology Center, Office of Collaborative Science, NYU School of Medicine, NY 10016, USA

<sup>3</sup> Department of Pathology, NYU School of Medicine, New York, New York 10016, USA

<sup>4</sup> NYU Cancer Institute and Helen L. and Martin S. Kimmel Center for Stem Cell Biology, NYU School of Medicine, New York, New York 10016, USA

<sup>5</sup> Center for Health Informatics & Bioinformatics, NYU School of Medicine, NY 10016, USA

March 22, 2016

## Contents

|          |                                    |           |
|----------|------------------------------------|-----------|
| <b>1</b> | <b>Introduction</b>                | <b>2</b>  |
| 1.1      | Installation                       | 2         |
| 1.2      | Compile Binaries                   | 2         |
| 1.3      | Setting up a new analysis          | 2         |
| 1.4      | Setting input files                | 3         |
| 1.5      | Create project sample sheet        | 3         |
| 1.6      | Running the Pipeline               | 3         |
| 1.7      | Dependencies                       | 5         |
| <b>2</b> | <b>Default Pipeline Components</b> | <b>6</b>  |
| 2.1      | Parent Directory Overview          | 6         |
| 2.2      | Code Directories                   | 7         |
| 2.3      | Data Directory                     | 7         |
| 2.4      | Inputs Directory                   | 7         |
| 2.5      | Pipeline Directory                 | 8         |
| <b>3</b> | <b>Custom Pipeline Steps</b>       | <b>12</b> |
| 3.1      | Overview                           | 12        |
| 3.2      | How To Add Steps                   | 12        |
| <b>4</b> | <b>HiC-Seq Pipeline</b>            | <b>19</b> |
| 4.1      | Pipeline Steps                     | 19        |
| 4.2      | Alignment                          | 22        |
| 4.3      | Filter                             | 23        |
| 4.4      | Filter Stats                       | 24        |
| 4.5      | Tracks                             | 27        |
| 4.6      | Matrix Filtered                    | 29        |
| 4.7      | Matrix Prep                        | 31        |
| 4.8      | Matrix IC                          | 32        |
| 4.9      | Matrix HiCNorm                     | 33        |
| 4.10     | Matrix Stats                       | 34        |
| 4.11     | Compare Matrices                   | 36        |
| 4.12     | Compare Matrices Stats             | 38        |
| 4.13     | Boundary Scores                    | 41        |
| 4.14     | Boundary Scores PCA                | 42        |
| 4.15     | Domains                            | 44        |
| 4.16     | Compare Boundaries                 | 45        |
| 4.17     | Compare Boundaries Stats           | 46        |
| 4.18     | HiC Plotter                        | 49        |
| 4.19     | Interactions                       | 51        |
| 4.20     | Annotations                        | 53        |
| 4.21     | Annotations Stats                  | 54        |

|                                    |           |
|------------------------------------|-----------|
| <b>5 Appendix</b>                  | <b>56</b> |
| 5.1 Error Logs                     | 56        |
| 5.2 gtools-hic                     | 56        |
| 5.3 pipeline-master-explorer       | 59        |
| 5.4 System and Session Information | 60        |

## List of Figures

|                                                                                      |    |
|--------------------------------------------------------------------------------------|----|
| 1 Example sample sheet                                                               | 4  |
| 2 Overview of pipeline step execution for default analysis steps. See Section 4.1.2. | 21 |
| 3 Filter Stats counts sample output                                                  | 25 |
| 4 Filter Stats percentage sample output                                              | 26 |
| 5 WashU tracks loaded in browser.                                                    | 28 |
| 6 Matrix Stats sample output                                                         | 35 |
| 7 Compare Matrices Stats Spearman sample correlograms. See Section 4.12.             | 39 |
| 8 Compare Matrices Stats Pearson sample correlograms. See Section 4.12.              | 40 |
| 9 Boundary Scores PCA sample output. See Section 4.14.                               | 43 |
| 10 Example raw comparisons. See Section 4.17.                                        | 47 |
| 11 Example correlograms. See Section 4.17.                                           | 48 |
| 12 HiCPlotter sample output                                                          | 50 |
| 13 Interactions sample output                                                        | 52 |
| 14 Annotation Stats enrichment sample output. See Section 4.21.                      | 55 |

# 1 Introduction

## 1.1 Installation

The analysis pipeline can be installed by cloning its git repository from GitHub, located here: <https://github.com/NYU-BFX/hic-bench>. In the Terminal (OS X, Linux), run a command such as the following:

```
git clone https://github.com/NYU-BFX/hic-bench.git
```

Once a clone of the pipeline repository has been made, it will be used as a blank template to start future analysis; analysis is not performed directly in the pipeline repository.

## 1.2 Compile Binaries

Source code for needed binaries has been included in the repository, and must be compiled. Navigate to the `code/src` directory from within the Terminal, and run the command `make` to automatically run the compilation scripts needed. The program `bedGraphToBigWig` is also required, and available as a binary file from UCSC at their page here: <http://hgdownload.cse.ucsc.edu/admin/exe/>. To directly install a version compatible with the Linux operating system, navigate to the `code/bin` directory and run the command `wgethttp://hgdownload.cse.ucsc.edu/admin/exe/linux.x86_64/bedGraphToBigWig`.

## 1.3 Setting up a new analysis

Assuming your pipeline repository clone exists at `~/hic-bench`, use the following terminal command to create a new analysis:

```
~/hic-bench/code/code.main/pipeline-new-analysis hicseq-standard <project_name>
```

This will create a new directory at the given location, and copy into it all the basic files and sub-directories needed for analysis from the pipeline repository.

## 1.4 Setting input files

Manual setup for the pipeline input files requires the creation of the directories `<project_name>\pipeline\input\fastq` or `<project_name>\pipeline\input\bam`, corresponding to the type of input files to be used. Sub-directories within these should be created with the name of each sample to be included in the analysis. A naming scheme similar to the following is suggested:

```
<Cell_line>--<treatment>--<SampleID>
```

Importantly, the '-' should be used as a delimiter, since this is recognized by the sample sheet creation script. Within each sub-directory, place all fastq / fastq.gz or bam files for the sample. Symlinks can be used if the files are not contained in the same location as the project analysis directory, and are preferable in order to save storage space. Since this part of the pipeline setup is custom for each analysis, it must be completed manually. A script used to automatically create the correct directories and symlinks might look like this:

```
1 #!/bin/bash
Fastq_dir="/data/sequence/results/smithlab/2016-01-28/fastq"
3 Inputs_dir="/home/$(whoami)/projects/SmithLab_HiC_2016-02-09/inputs/fastq"
5 # make inputs dir
mkdir -p "$Inputs_dir"
7
9 for i in $Fastq_dir/*.fastq.gz; do
echo "$i"
TMP_NAME=$(echo "$(basename "$i")" | sed -nr 's/^(([[:digit:]]+)[[:alnum:]]+([[:alpha:]]+)[^[:alnum:]]+)$/THP1
-\2-\1/p' )
11 echo "$TMP_NAME"
mkdir -p "$Inputs_dir/$TMP_NAME"
13 ln -s "$i" "$Inputs_dir/$TMP_NAME"
done
```

## 1.5 Create project sample sheet

A sample sheet must be created for the analysis project. After the inputs directory has been set up, the follow command can be used to automatically create a sample sheet template:

```
inputs$ ./code/create-sample-sheet.tclsh <genome> <fragment-size>
```

Where genome is hg19, hg38, etc.. The fragment-size entry is optional and should be a numeric argument such as 300, representing the library size of the sequencing sample. After creation of the sample sheet (`sample-sheet.tsv`), a manual review process is required to match the correct control or input samples with experimental samples, verify proper grouping names, files, and other entries. If not entered prior, fragment-size should be filled in for each sample. This process can be completed within Microsoft Excel, but saving the file in Excel should be avoided due to the introduction of invisible formatting errors by Microsoft Office products. It is advisable to instead copy the finalized sheet from Excel and paste directly into a terminal text editor such as vi or nano for saving under the file name `sample-sheet.tsv`.

## 1.6 Running the Pipeline

After navigating to the parent directory of the analysis project, run the pipeline with:

```
1 ./code.main/pipeline-execute PROJECT-NAME E-MAIL
```

| sample                | group            | fastq-r1                                                             | fastq-r2                                                             | genome | enzyme  | cell_type |
|-----------------------|------------------|----------------------------------------------------------------------|----------------------------------------------------------------------|--------|---------|-----------|
| CD34-HindIII-rep1     | CD34-HindIII     | CD34-HindIII-rep1/CD34-no_treat-Osb2015-HindIII-HIC_L001_R1.fastq.gz | CD34-HindIII-rep1/CD34-no_treat-Osb2015-HindIII-HIC_L001_R2.fastq.gz | hg19   | HindIII | CD34      |
| H1-HindIII-rep1       | H1-HindIII       | H1-HindIII-rep1/hESC-rep1a-HindIII-HIC_R1.fastq.gz                   | H1-HindIII-rep1/hESC-rep1a-HindIII-HIC_R2.fastq.gz                   | hg19   | HindIII | H1        |
| H1-HindIII-rep2       | H1-HindIII       | H1-HindIII-rep2/hESC-rep2a-HindIII-HIC_R1.fastq.gz                   | H1-HindIII-rep2/hESC-rep2a-HindIII-HIC_R2.fastq.gz                   | hg19   | HindIII | H1        |
| IMR90-HindIII-rep1    | IMR90-HindIII    | IMR90-HindIII-rep1/SRR400264_R1.fastq.gz                             | IMR90-HindIII-rep1/SRR400264_R2.fastq.gz                             | hg19   | HindIII | IMR90     |
| IMR90-HindIII-rep2    | IMR90-HindIII    | IMR90-HindIII-rep2/SRR442158_R1.fastq.gz                             | IMR90-HindIII-rep2/SRR442158_R2.fastq.gz                             | hg19   | HindIII | IMR90     |
| T47D_TO-HindIII-rep1  | T47D_TO-HindIII  | T47D_TO-HindIII-rep1/T47D_TO-HindIII-rep1-HiC_R1.fastq.gz            | T47D_TO-HindIII-rep1/T47D_TO-HindIII-rep1-HiC_R2.fastq.gz            | hg19   | HindIII | T47D      |
| T47D_TO-Ncol-rep1     | T47D_TO-Ncol     | T47D_TO-Ncol-rep1/T47D_TO-Ncol-rep1-HiC_R1.fastq.gz                  | T47D_TO-Ncol-rep1/T47D_TO-Ncol-rep1-HiC_R2.fastq.gz                  | hg19   | Ncol    | T47D      |
| T47D_T60-HindIII-rep1 | T47D_T60-HindIII | T47D_T60-HindIII-rep1/T47D_T60-HindIII-rep1-HiC_R1.fastq.gz          | T47D_T60-HindIII-rep1/T47D_T60-HindIII-rep1-HiC_R2.fastq.gz          | hg19   | HindIII | T47D      |
| T47D_T60-Ncol-rep1    | T47D_T60-Ncol    | T47D_T60-Ncol-rep1/T47D_T60-Ncol-rep1-HiC_R1.fastq.gz                | T47D_T60-Ncol-rep1/T47D_T60-Ncol-rep1-HiC_R2.fastq.gz                | hg19   | Ncol    | T47D      |
| mESC_J1-HindIII-rep1  | mESC_J1-HindIII  | mESC_J1-HindIII-rep1/mESC_J1-HindIII-rep1a-HiC_R1.fastq.gz           | mESC_J1-HindIII-rep1/mESC_J1-HindIII-rep1a-HiC_R2.fastq.gz           | mm10   | HindIII | mESC_J1   |
| mESC_J1-HindIII-rep2  | mESC_J1-HindIII  | mESC_J1-HindIII-rep2/mESC_J1-HindIII-rep2a-HiC_R1.fastq.gz           | mESC_J1-HindIII-rep2/mESC_J1-HindIII-rep2a-HiC_R2.fastq.gz           | mm10   | HindIII | mESC_J1   |
| mESC_J1-Ncol-rep1     | mESC_J1-Ncol     | mESC_J1-Ncol-rep1/mESC_J1-Ncol-rep1a-HiC_R1.fastq.gz                 | mESC_J1-Ncol-rep1/mESC_J1-Ncol-rep1a-HiC_R2.fastq.gz                 | mm10   | Ncol    | mESC_J1   |

Figure 1: Example sample sheet

## 1.7 Dependencies

This pipeline was developed for use in a High Performance Computing environment, running CentOS 6. Additionally, tcsh and bash shells are required, along with R version 3.2.0. The following includes software used in the HiC-Seq pipeline:

```
1 OGS/Grid Engine 2011.11
Linux 2.6.32-573.3.1.el6.x86_64 #1 SMP Thu Aug 13 22:55:16 UTC 2015 x86_64 GNU/Linux
3 tcsh 6.17.00 (Astron) 2009-07-10 (x86_64-unknown-linux)
GNU bash, version 4.1.2(1)-release (x86_64-redhat-linux-gnu)
5 armatus/2014-05-19
bedtools/2.22.0
7 bowtie2/2.2.6
caltads/0.1.0
9 ghmm/0.9
java/1.7
11 matlab/R2013a
picard-tools
13 python/2.7.3
r/3.2.0
15 r/3.2.3
samtools/1.2.1
```

The following R packages are used in the pipeline:

```
plyr 1.8.1
2 VennDiagram 1.6.16
flsa 1.05
4 genlasso 1.3
ggplot2 1.0.1
6 optparse 1.3.0
pastecs 1.3-18
8 plotrix 3.5-11
reshape2 1.4.1
10 zoo 1.7-12
preprocessCore 1.24.0
12 MASS 7.3-35
gplots 2.17.0
14 reshape 0.8.5
corrplot 0.73
16 RColorBrewer 1.1-2
lattice 0.20-33
18 grid
stringr 1.0.0
```

For software information specific to the creation of this document, see Section 5.4

## 2 Default Pipeline Components

### 2.1 Parent Directory Overview

A default pipeline will have the following basic structure within its parent directory:

```
1 hicseq.analysis-for-hicbench$
2 lrwxrwxrwx 1 at570 14 Feb 14 19:28 __01a-align -> pipeline/align
3 lrwxrwxrwx 1 at570 15 Feb 14 19:28 __02a-filter -> pipeline/filter
4 lrwxrwxrwx 1 at570 21 Feb 14 19:28 __02b-filter-stats -> pipeline/filter-stats
5 lrwxrwxrwx 1 at570 15 Feb 14 19:28 __03a-tracks -> pipeline/tracks
6 lrwxrwxrwx 1 at570 24 Feb 14 19:28 __04a-matrix-filtered -> pipeline/matrix-filtered
7 lrwxrwxrwx 1 at570 20 Feb 14 19:28 __05a-matrix-prep -> pipeline/matrix-prep
8 lrwxrwxrwx 1 at570 18 Feb 14 19:28 __06a-matrix-ic -> pipeline/matrix-ic
9 lrwxrwxrwx 1 at570 23 Feb 14 19:28 __07a-matrix-hicnorm -> pipeline/matrix-hicnorm
10 lrwxrwxrwx 1 at570 21 Feb 14 19:28 __08a-matrix-stats -> pipeline/matrix-stats
11 lrwxrwxrwx 1 at570 25 Feb 14 19:28 __09a-compare-matrices -> pipeline/compare-matrices
12 lrwxrwxrwx 1 at570 31 Feb 14 19:28 __09b-compare-matrices-stats -> pipeline/compare-matrices-stats
13 lrwxrwxrwx 1 at570 24 Feb 14 19:28 __10a-boundary-scores -> pipeline/boundary-scores
14 lrwxrwxrwx 1 at570 28 Feb 14 19:28 __10b-boundary-scores-pca -> pipeline/boundary-scores-pca
15 lrwxrwxrwx 1 at570 16 Feb 14 19:28 __11a-domains -> pipeline/domains
16 lrwxrwxrwx 1 at570 27 Feb 14 19:28 __12a-compare-boundaries -> pipeline/compare-boundaries
17 lrwxrwxrwx 1 at570 33 Feb 14 19:28 __12b-compare-boundaries-stats -> pipeline/compare-boundaries-stats
18 lrwxrwxrwx 1 at570 19 Feb 14 19:28 __13a-hicplotter -> pipeline/hicplotter
19 lrwxrwxrwx 1 at570 21 Feb 14 19:28 __14a-interactions -> pipeline/interactions
20 lrwxrwxrwx 1 at570 20 Feb 14 19:28 __15a-annotations -> pipeline/annotations
21 lrwxrwxrwx 1 at570 26 Feb 14 19:28 __15b-annotations-stats -> pipeline/annotations-stats
22 lrwxrwxrwx 1 at570 30 Feb 18 11:16 code -> code.repo/code.hicseq-standard
23 lrwxrwxrwx 1 at570 14 Nov 12 11:55 code.main -> code/code.main
24 drwxr-xr-x 10 at570 238 Feb 15 19:53 code.repo
25 lrwxrwxrwx 1 at570 36 Mar 10 16:30 data -> /ifs/home/at570/pipeline-master/data
26 drwxr-xr-x 5 at570 230 Jan 5 09:24 inputs
27 drwxr-xr-x 25 at570 834 Feb 14 19:28 pipeline
28 -rwxr-xr-x 1 at570 981 Jan 5 19:40 run
29 -rwxr-xr-x 1 at570 554 Dec 18 17:02 run.dry
```

The following components can be seen here:

- `__01a-align ... __15b-annotations-stats`: Symlinks to each step in the pipeline, in alphanumeric order of execution.
- `code`: Symlink to the directory containing scripts and code specific to the current analysis type e.g. CHIP-Seq.
- `code.main`: Symlink to the directory containing scripts and code used for all pipelines.
- `code.repo`: Directory containing all code for the project, copied from the main pipeline repository.
- `data`: Symlink to a directory containing reference genome data; set this in your original repository clone.
- `inputs`: Directory containing information on the files used as inputs.
- `pipeline`: Directory containing the files needed for each step in the pipeline.
- `project_notes`: A bare directory in which you can place miscellaneous notes and documents concerning the analysis.
- `run`: File containing code for running the pipeline.
- `run.dry`: File containing code for testing the pipeline without execution of pipeline steps.

## 2.2 Code Directories

The code needed for the execution of the analysis pipeline is divided among several sub-directories, based on usage. Within an analysis pipeline, the directory `code.repo` contains all of these sub-directories.

```
1 hicseq.analysis--for--hicbench/code.repo$
2 drwxr-xr-x  2 at570  434 Dec 30 11:47 bin
3 drwxr-xr-x  3 at570  1.7K Feb 15 19:53 code.chipseq-standard
4 drwxr-xr-x  3 at570  2.4K Feb 15 13:28 code.hicseq-standard
5 drwxr-xr-x  2 at570  2.1K Feb 15 19:53 code.main
```

- `bin`: A directory containing symlinks to binary files for programs used by the pipeline.
- `code.chipseq-standard`, `code.hicseq-standard`: Directories containing scripts specific to the execution of each step in the the given type of pipeline analysis.
- `code.main`: A directory containing code and scripts used for all analysis pipelines.

## 2.3 Data Directory

The reference genome information needed for analysis is contained in the `data` directory. This can be contained in an external location and symlinked to the project directory if it has not already been set in the cloned HiC-bench repository template. Our example `data` contains only the subdirectory `genomes`, which is configured as such:

```
1 data/genomes/hg19$
2 -rw-r--r--  1 at570  36M Nov 23 12:43 HindIII.fragments.bed
3 -rw-r--r--  1 at570 298M Mar  7 15:58 Mbol.fragments.bed
4 -rw-r--r--  1 at570  32M Nov 23 12:43 NcoI.fragments.bed
5 lrwxrwxrwx  1 at570  at570   20 Nov 23 12:41 bowtie2.index -> genome/bowtie2.index
6 -rw-r--r--  1 at570  1.5K Nov 23 13:43 centrotelo.bed
7 drwxr-xr-x  2 at570  1.2K Mar  7 16:00 features-hicnorm
8 -rw-r--r--  1 at570  2.2M Dec 30 22:58 gene-name.bed
9 -rw-r--r--  1 at570  2.2M Nov 30 15:43 gene.bed
10 lrwxrwxrwx  1 at570  at570   33 Nov 23 12:34 genome -> /ifs/home/at570/Data/Genomes/hg19
11 -rw-r--r--  1 at570  564 Nov 23 13:43 genome.bed
13 data/genomes/mm10$
14 -rw-r--r--  1 at570  36M Nov 23 12:47 HindIII.fragments.bed
15 -rw-r--r--  1 at570  37M Nov 23 12:47 NcoI.fragments.bed
16 lrwxrwxrwx  1 at570  at570   20 Nov 23 12:47 bowtie2.index -> genome/bowtie2.index
17 -rw-r--r--  1 at570  1.3K Nov 23 13:48 centrotelo.bed
18 drwxr-xr-x  2 at570  1.2K Mar  7 16:00 features-hicnorm
19 -rw-r--r--  1 at570  1.4M Dec 30 22:58 gene-name.bed
20 -rw-r--r--  1 at570  1.4M Nov 30 15:43 gene.bed
21 lrwxrwxrwx  1 at570  at570   33 Nov 23 12:47 genome -> /ifs/home/at570/Data/Genomes/mm10
22 -rw-r--r--  1 at570  495 Nov 23 13:48 genome.bed
```

Also included are indexes for `bowtie2`, which can be obtained from [bowtie-bio.sourceforge.net/bowtie2/manual.shtml](http://bowtie-bio.sourceforge.net/bowtie2/manual.shtml) or [http://support.illumina.com/sequencing/sequencing\\_software/igenome.html](http://support.illumina.com/sequencing/sequencing_software/igenome.html).

## 2.4 Inputs Directory

The `inputs` directory contains files needed to run the pipeline.

```
1 hicseq.analysis--for--hicbench/inputs$
2 -rw-r--r--  1 at570  483 Dec 28 12:20 README
3 lrwxrwxrwx  1 at570   7 Oct  1 14:31 code -> ../code
4 lrwxrwxrwx  1 at570   7 Dec 21 08:19 data -> ../data
5 drwxr-xr-x  2 at570  685 Oct 27 13:46 fastq
6 lrwxrwxrwx  1 at570  12 Jan  5 09:23 genomes -> data/genomes
7 drwxr-xr-x  2 at570   29 Feb 15 13:30 params
8 lrwxrwxrwx  1 at570   5 Feb 11 15:24 results -> fastq
9 -rw-r--r--  1 at570  4.0K Feb 11 15:25 sample-sheet.tsv
```

- `README`: File containing usage notes for the inputs directory.
- `code`: Symlink to `code` one level up in the parent directory.
- `data`: Symlink to `data` one level up in the parent directory.
- `fastq`: Directory containing sub-directories for each sample to be used in the analysis. This directory is not created automatically, it must be created and populated manually. Alternatively, the directory `bam` can be used in its place if `.bam` files are to be used.
- `genomes`: Symlink to the directory containing reference genome information, within the `data` directory.
- `params`: Directory containing the parameters files associated with the input files.
- `sample-sheet.tsv`: Sample sheet for pipeline execution.

### 2.4.1 FASTQ Directory

The contents of an example `fastq` directory can be seen here:

```

1 hicseq.analysis-for-hicbench/inputs/fastq$
lrwxrwxrwx 1 at570 97 Feb 12 15:43 CD34-HindIII-rep1
3 lrwxrwxrwx 1 at570 95 Feb 12 15:43 GM-HindIII-rep1
lrwxrwxrwx 1 at570 92 Feb 12 15:43 GM-NcoI-rep1
5 lrwxrwxrwx 1 at570 103 Feb 12 15:43 H1-HindIII-Ren2015_rep1
lrwxrwxrwx 1 at570 103 Feb 12 15:43 H1-HindIII-Ren2015_rep2
7 lrwxrwxrwx 1 at570 95 Feb 12 15:43 H1-HindIII-rep1
lrwxrwxrwx 1 at570 95 Feb 12 15:43 H1-HindIII-rep2
9 lrwxrwxrwx 1 at570 98 Feb 12 15:43 IMR90-HindIII-rep1
lrwxrwxrwx 1 at570 98 Feb 12 15:43 IMR90-HindIII-rep2
11 lrwxrwxrwx 1 at570 100 Feb 12 15:43 T47D_T0-HindIII-rep1
lrwxrwxrwx 1 at570 97 Feb 12 15:43 T47D_T0-NcoI-rep1
13 lrwxrwxrwx 1 at570 101 Feb 12 15:43 T47D_T60-HindIII-rep1
lrwxrwxrwx 1 at570 98 Feb 12 15:43 T47D_T60-NcoI-rep1
15 lrwxrwxrwx 1 at570 100 Feb 12 15:43 mESC_J1-HindIII-rep1
lrwxrwxrwx 1 at570 100 Feb 12 15:43 mESC_J1-HindIII-rep2
17 lrwxrwxrwx 1 at570 97 Feb 12 15:43 mESC_J1-NcoI-rep1

```

Each directory name contains information about the sample, in the format `<CellLine>-<treatment>-<SampleID>`. This format can be modified to suit your purposes, though it is recommended to retain the "-" character as a delimiter since it is used downstream in the sample sheet generation steps. Each directory should contain all of the `.fastq` / `.fastq.gz` files associated with the sample; symlinks pointing to each file can be used as well, and are encouraged in order to save disk space. The same protocol should be followed if `.bam` files are to be used. As per standard Linux Terminal guidelines, spaces and special characters should be avoided in file names and directory names.

### 2.5 Pipeline Directory

The pipeline directory contains information for each step in the pipeline. An example pipeline directory will have the following structure:

```

1 hicseq.analysis-for-hicbench/pipeline$
drwxr-xr-x 5 at570 228 Feb 15 16:47 align
3 drwxr-xr-x 5 at570 207 Jan 19 22:12 annotations
drwxr-xr-x 5 at570 213 Feb 16 17:24 annotations-stats
5 drwxr-xr-x 5 at570 211 Feb 6 17:46 boundary-scores
drwxr-xr-x 5 at570 389 Mar 10 18:16 boundary-scores-pca
7 lrwxrwxrwx 1 at570 7 Dec 2 12:39 code -> ../code
lrwxrwxrwx 1 at570 12 Dec 2 12:39 code.main -> ../code.main
9 drwxr-xr-x 5 at570 385 Jan 19 22:08 compare-boundaries
drwxr-xr-x 5 at570 437 Mar 10 18:16 compare-boundaries-stats

```



```

11 drwxr-xr-x 5 at570 212 Jan 19 16:04 compare-matrices
   drwxr-xr-x 5 at570 429 Mar 10 18:15 compare-matrices-stats
13 drwxr-xr-x 4 at570 420 Jan 19 22:10 diff-domains
   drwxr-xr-x 5 at570 231 Jan 20 13:06 domains
15 drwxr-xr-x 5 at570 229 Jan 19 16:19 filter
   drwxr-xr-x 6 at570 256 Jan 19 15:53 filter-stats
17 drwxr-xr-x 5 at570 206 Jan 19 22:11 hicplotter
   -rw-r--r- 1 at570 331 Feb 14 19:28 index.txt
19 lrwxrwxrwx 1 at570 9 Dec 2 12:39 inputs -> ../inputs
   drwxr-xr-x 5 at570 208 Jan 19 22:12 interactions
21 drwxr-xr-x 4 at570 362 Jan 19 16:01 matrix-estimated
   drwxr-xr-x 5 at570 211 Jan 19 16:08 matrix-filtered
23 drwxr-xr-x 5 at570 794 Feb 7 17:05 matrix-hicnorm
   drwxr-xr-x 5 at570 205 Jan 19 16:00 matrix-ic
25 drwxr-xr-x 5 at570 207 Jan 19 15:59 matrix-prep
   drwxr-xr-x 5 at570 361 Jan 19 16:03 matrix-stats
27 drwxr-xr-x 4 at570 158 Dec 22 17:44 template
   drwxr-xr-x 5 at570 229 Jan 19 15:55 tracks

```

- `align ... qc`: Directories containing the information for each pipeline step.
- `code`: Symlink to the directory containing code specific to current the analysis type.
- `code.main`: Symlink to the directory containing code used for all analyses.
- `inputs`: Symlink to the `inputs` directory containing the `.fastq` or `.bam` files for the pipeline.
- `index.txt`: A text file containing a list of pipeline steps to be executed. Entries in this document match the names of the pipeline directories.

### 2.5.1 Pipeline Index

The file `index.txt` contains a list of the pipeline steps to be completed during the analysis, listed in order of completion. An example `index.txt` would have the following structure:

```

hicseq.analysis-for-hicbench/pipeline$ cat index.txt
2 align
4 filter
  filter-stats
6 tracks
8 matrix-filtered
10 matrix-prep
12 matrix-ic
14 matrix-hicnorm
16 #matrix-estimated
18 #
  matrix-stats
20 compare-matrices
  compare-matrices-stats
22
24 boundary-scores
  boundary-scores-pca
26 domains
28 compare-boundaries
  compare-boundaries-stats
30
32 #diff-domains
  #
34 hicplotter
36 interactions

```

```
38 annotations
   annotations-stats
```

Each entry in the `index.txt` file matches the name of the pipeline step to be completed, represented by the corresponding name of the step's sub-directory in the `pipeline` directory. One entry is allowed per line in the `index.txt` file. Entries that begin with a '#' character will be ignored, and pipeline steps that are not included in the `index.txt` file will not be included in the analysis pipeline.

## 2.5.2 Example Pipeline Step Directory Structure

Each step in the pipeline is represented by a sub-directory in the `pipeline` directory. An example sub-directory for a pipeline step would have the following structure:

```
1 hicseq.analysis-for-hicbench/pipeline/align$
  lrwxrwxrwx 1 at570 15 Oct 28 12:10 clean.tcsh -> code/clean.tcsh
3  lrwxrwxrwx 1 at570  7 Sep 29 13:31 code -> ../code
  -rw-r--r-- 1 at570  0 Jan 25 11:12 error.log
5  drwxr-xr-x 2 at570 24 Feb 15 16:47 inpdirs
  lrwxrwxrwx 1 at570  9 Sep 29 13:31 inputs -> ../inputs
7  drwxr-xr-x 2 at570 77 Dec 28 13:42 params
  drwxr-xr-x 3 at570 62 Feb 16 12:27 results
9  lrwxrwxrwx 1 at570 14 Jan 19 15:50 run -> run-align.tcsh
  -rwxr-xr-x 1 at570 971 Jan 19 15:49 run-align.tcsh
```

- `clean.tcsh`: Script for cleaning the directory; remove results and error logs.
- `code`: Symlink to the directory containing code specific to the analysis type e.g. `code.chipseq-standard` in this case.
- `error.log`: File containing errors encountered during execution of the pipeline step, generated at runtime.
- `inpdirs`: Directory containing symlinks to directories containing input files for use during execution of the pipeline step.
- `inputs`: Symlink to the directory containing input files.
- `params`: Directory containing the parameters files associated with the pipeline step files.
- `run`: Symlink to the 'run' file for the pipeline step.
- `run-align.tcsh`: 'Run' file for the pipeline step, containing a script that passes pipeline execution information to the wrapper script located in `./code/code.main/pipeline-master-explorer.r`.

## 2.5.3 Example Pipeline Step Results Directory

The base level of a results directory for a pipeline step will have the following structure:

```
2 hicseq.analysis-for-hicbench/pipeline/align/results/align.by_sample.bowtie2/CD34-HindIII-rep1$
  -rw-r--r-- 1 at570 49G Jan 13 01:02 alignments.bam
  -rw-r--r-- 1 at570 473 Jan 13 01:02 job.err
4  -rw-r--r-- 1 at570  47 Jan 12 18:42 job.id
  -rw-r--r-- 1 at570  0 Jan 12 18:42 job.out
6  -rw-r--r-- 1 at570 136 Jan 12 18:42 job.sh
  -rw-r--r-- 1 at570 2.3K Jan 13 01:02 job.vars.tsv
```

- `alignments.bam`: Example alignment output file.
- `job.err`: File containing the standard error output of the pipeline step.

- `job.id`: File containing the ID number of the job after submission for execution on the HPC cluster.
- `job.out`: File containing the standard output of the pipeline step.
- `job.sh`: File containing the command submitted for execution on the HPC cluster.
- `job.vars.tsv`: File containing the variables used in the completion of the pipeline step.

## 3 Adding Custom Pipeline Steps

### 3.1 Custom Pipeline Step Overview

The following basic steps should be taken to create a custom pipeline step:

- Copy an existing step as a template
- Update the new pipeline step name and add it to the entries in the `index.txt` and as a symlink in the parent level of the analysis directory
- Set the input directories ('inpdirs')
- Edit the 'run' file and add needed parameter files
- Add a script in the `code` directory containing the commands needed to run the programs used in the pipeline step

### 3.2 How To Add Custom Pipeline Steps

The steps needed to create a custom pipeline step are explained in detail here:

1. Within the pipeline directory, use a command such as `cp -r` to make a copy of an existing pipeline step as a template for the new one.

Example pipeline directory:

```
1 hicseq.analysis-for-hicbench/pipeline$ ls -l
total 818K
3 drwxr-xr-x 25 at570 at570 834 Mar 18 17:14 .
  drwxr-xr-x 5 at570 at570 958 Mar 21 19:09 ..
5 drwxr-xr-x 5 at570 at570 228 Mar 10 16:20 align
  drwxr-xr-x 5 at570 at570 234 Mar 21 19:18 annotations
7 drwxr-xr-x 5 at570 at570 240 Mar 21 19:40 annotations-stats
  drwxr-xr-x 5 at570 at570 238 Mar 18 20:44 boundary-scores
9 drwxr-xr-x 5 at570 at570 242 Mar 21 16:37 boundary-scores-pca
  lrwxrwxrwx 1 at570 at570 7 Mar 10 16:20 code -> ../code
11 lrwxrwxrwx 1 at570 at570 12 Mar 10 16:20 code.main -> ../code.main
  drwxr-xr-x 5 at570 at570 241 Mar 21 16:37 compare-boundaries
13 drwxr-xr-x 5 at570 at570 247 Mar 21 16:37 compare-boundaries-stats
  drwxr-xr-x 5 at570 at570 239 Mar 18 20:20 compare-matrices
15 drwxr-xr-x 5 at570 at570 245 Mar 21 16:37 compare-matrices-stats
  drwxr-xr-x 4 at570 at570 245 Mar 21 16:37 diff-domains
17 drwxr-xr-x 5 at570 at570 230 Mar 18 21:22 domains
  drwxr-xr-x 5 at570 at570 229 Mar 10 16:20 filter
19 drwxr-xr-x 6 at570 at570 256 Mar 10 16:20 filter-stats
  drwxr-xr-x 7 at570 at570 323 Mar 21 16:41 hicplotter
21 -rw-r--r-- 1 at570 at570 331 Mar 10 16:20 index.txt
  lrwxrwxrwx 1 at570 at570 9 Mar 10 16:20 inputs -> ../inputs
23 drwxr-xr-x 5 at570 at570 235 Mar 10 16:20 interactions
  drwxr-xr-x 4 at570 at570 187 Mar 21 16:37 matrix-estimated
25 drwxr-xr-x 5 at570 at570 238 Mar 10 16:20 matrix-filtered
  drwxr-xr-x 5 at570 at570 260 Mar 10 16:20 matrix-hicnorm
27 drwxr-xr-x 5 at570 at570 232 Mar 10 16:20 matrix-ic
  drwxr-xr-x 5 at570 at570 234 Mar 18 17:31 matrix-prep
29 drwxr-xr-x 5 at570 at570 235 Mar 21 16:37 matrix-stats
  lrwxrwxrwx 1 at570 hpchic 8 Dec 3 14:56 psync -> ../psync
31 drwxr-xr-x 4 at570 at570 158 Mar 10 16:20 template
  drwxr-xr-x 5 at570 at570 229 Mar 10 16:20 tracks
```

2. Adjust the name of the new directory to match the desired name of the new pipeline step. Add this name as an entry in the `index.txt` file, and make a symlink to this directory from the parent directory in the same style of the existing symlinks to other pipeline steps. The alpha-numeric prefix on the symlink will determine the order in which it will be executed. The command to do this might look like this:

```
hicseq.analysis-for-hicbench$ ln -s pipeline/my_new_step __03b-my_new_step
```

### Example index.txt file contents:

```
1 hicseq.analysis-for-hicbench/pipeline$ cat index.txt
align
3
5 filter
filter-stats
7 tracks
9 matrix-filtered
11 matrix-prep
13 matrix-ic
15 matrix-hicnorm
17 #matrix-estimated
#
19 matrix-stats
21 compare-matrices
compare-matrices-stats
23
25 boundary-scores
boundary-scores-pca
27 domains
29 compare-boundaries
compare-boundaries-stats
31
#diff-domains
#
33 hicplotter
35
37 interactions
39 annotations
annotations-stats
```

### Example parent directory structure:

```
1 hicseq.analysis-for-hicbench$ ls -l
lrwxrwxrwx 1 at570 at570 14 Mar 10 16:20 __01a-align -> pipeline/align
3 lrwxrwxrwx 1 at570 at570 15 Mar 10 16:20 __02a-filter -> pipeline/filter
lrwxrwxrwx 1 at570 at570 21 Mar 10 16:20 __02b-filter-stats -> pipeline/filter-stats
5 lrwxrwxrwx 1 at570 at570 15 Mar 10 16:20 __03a-tracks -> pipeline/tracks
lrwxrwxrwx 1 at570 at570 24 Mar 10 16:20 __04a-matrix-filtered -> pipeline/matrix-filtered
7 lrwxrwxrwx 1 at570 at570 20 Mar 10 16:20 __06a-matrix-ic -> pipeline/matrix-ic
lrwxrwxrwx 1 at570 at570 23 Mar 10 16:20 __07a-matrix-hicnorm -> pipeline/matrix-hicnorm
9 lrwxrwxrwx 1 at570 at570 21 Mar 10 16:20 __08a-matrix-stats -> pipeline/matrix-stats
11 lrwxrwxrwx 1 at570 at570 25 Mar 10 16:20 __09a-compare-matrices -> pipeline/compare-matrices
lrwxrwxrwx 1 at570 at570 31 Mar 10 16:20 __09b-compare-matrices-stats -> pipeline/compare-matrices-stats
13 lrwxrwxrwx 1 at570 at570 24 Mar 10 16:20 __10a-boundary-scores -> pipeline/boundary-scores
lrwxrwxrwx 1 at570 at570 28 Mar 10 16:20 __10b-boundary-scores-pca -> pipeline/boundary-scores-pca
15 lrwxrwxrwx 1 at570 at570 16 Mar 10 16:20 __11a-domains -> pipeline/domains
lrwxrwxrwx 1 at570 at570 27 Mar 10 16:20 __12a-compare-boundaries -> pipeline/compare-boundaries
17 lrwxrwxrwx 1 at570 at570 33 Mar 10 16:20 __12b-compare-boundaries-stats -> pipeline/compare-boundaries-
stats
lrwxrwxrwx 1 at570 at570 19 Mar 10 16:20 __13a-hicplotter -> pipeline/hicplotter
19 lrwxrwxrwx 1 at570 at570 21 Mar 10 16:20 __14a-interactions -> pipeline/interactions
lrwxrwxrwx 1 at570 at570 20 Mar 10 16:20 __15a-annotations -> pipeline/annotations
21 lrwxrwxrwx 1 at570 at570 26 Mar 10 16:20 __15b-annotations-stats -> pipeline/annotations-stats
lrwxrwxrwx 1 at570 at570 30 Mar 14 18:25 code -> code.repo/code.hicseq-standard
23 lrwxrwxrwx 1 at570 at570 14 Mar 10 16:20 code.main -> code/code.main
drwxr-xr-x 10 at570 at570 238 Mar 13 21:45 code.repo
25 lrwxrwxrwx 1 at570 at570 104 Mar 14 18:25 data -> /ifs/home/at570/disk1/Resources/Code/pipeline-master/
code/code.main/../../pipelines/hicseq-standard/data
drwxr-xr-x 5 at570 at570 274 Mar 10 16:20 inputs
```

```

27 drwxr-xr-x 25 at570 at570 834 Mar 18 17:14 pipeline
   -rwxr-xr-x 1 at570 at570 211 Mar 11 12:06 psync
29 -rwxr-xr-x 1 at570 at570 888 Mar 10 16:20 run
   -rwxr-xr-x 1 at570 at570 898 Mar 10 16:20 run.dry

```

### 3. Edit the contents of the directory you have created to hold the information for your new pipeline step.

Example pipeline step directory:

```

hicseq.analysis-for-hicbench/pipeline/domains$ ls -l
2 lrwxrwxrwx 1 at570 at570 15 Mar 10 16:20 clean.tcsh -> code/clean.tcsh
  lrwxrwxrwx 1 at570 at570 7 Mar 10 16:20 code -> ../code
4 -rw-r--r-- 1 at570 at570 0 Mar 18 21:22 error.log
  drwxr-xr-x 2 at570 at570 155 Mar 10 16:20 inpdirs
6 lrwxrwxrwx 1 at570 at570 9 Mar 10 16:20 inputs -> ../inputs
  drwxr-xr-x 3 at570 at570 146 Mar 10 16:20 params
8 drwxr-xr-x 6 at570 at570 161 Mar 18 20:48 results
  lrwxrwxrwx 1 at570 at570 16 Mar 10 16:20 run -> run-domains.tcsh
10 -rwxr-xr-x 1 at570 at570 959 Mar 11 14:58 run-domains.tcsh

```

First, edit the run file. A sample run file looks like this:

```

hicseq.analysis-for-hicbench/pipeline/domains$ cat run
2 #!/bin/tcsh
  source ./code/code.main/custom-tcshrc      # customize shell environment
4
6 ##
  ## USAGE: run-domains.tcsh [--dry-run]
  ##
8
  # this section holds information that will be used in future updates of the software for reporting
10 #%% This step identifies topologically-associated domains (TADs) using different methods.
  #%% TABLES:
12 #%% FIGURES:
14
  # process command-line inputs
  # check to make sure that the proper number of arguments have been passed to the script,
16 # if not then print the script lines starting with '##' and exit
  if ($#argv > 1) then
18     grep '^##' $0 | scripts-send2err
     exit
20 endif
22
  set opt = "$1"
24
  # setup
  # set the 'operation' to be performed, aka name of the pipeline step
26 set op = domains
  # the directories to be used for inputs
28 set inpdirs = "inpdirs/*"
  # an expression which specifies which input branches to include
30 set filter = "*.res_40kb"      # work only with 40kb resolution
  # the name of the results directory
32 set results = results
34
  # create the results directory
  scripts-create-path $results/
36 # sends a message to the error logging script
  scripts-send2err "=== Operation = $op ====="
38 # 'resources' argument to be passed to qsub, referring to CPU cores and GB of RAM to be reserved for the
  job
  set resources = 1,20G
40 # command to be passed to the 'pipeline-master-explorer.r' script
  set cmd = "./code/code.main/scripts-qsub-wrapper $resources ./code/hicseq-$op.tcsh"
42
  # generate run script
44 # the 'pipeline-master-explorer.r' script parses the items set above to create a line of text containing
  the commands to be submitted to qsub
  Rscript ./code/code.main/pipeline-master-explorer.r -v -F "$filter" "$cmd" $results/$op "params/params.*.
    tcsh" "$inpdirs" "" "sample" 1
46
  # run and wait until done!
48 # if the '--dry-run' argument was not passed to the script
  if (" $opt" != "--dry-run") scripts-submit-jobs ./ $results/.db/run

```

---

As listed in the above `run` file, the following 'setup' items need to be set for the custom pipeline step:

```
1 set op = <name_of_pipeline_step>
```

The 'operation' to be performed is set as 'op' and should be the name of the pipeline step, as listed in the directory name and in the `index.txt` file.

```
1 set inpdirs = "inpdirs/*"
```

The 'inpdirs', or input directories, should be set as the file path to the directory containing symlinks to the input directories. In this case, the contents of `inpdirs` is as follows:

```
1 hicseq.analysis-for-hicbench/pipeline/domains$ ls -l inpdirs/
lrwxrwxrwx 1 at570 at570 22 Mar 10 16:20 matrix-estimated -> ../../matrix-estimated
3 lrwxrwxrwx 1 at570 at570 21 Mar 10 16:20 matrix-filtered -> ../../matrix-filtered
lrwxrwxrwx 1 at570 at570 20 Mar 10 16:20 matrix-hicnorm -> ../../matrix-hicnorm
5 lrwxrwxrwx 1 at570 at570 15 Mar 10 16:20 matrix-ic -> ../../matrix-ic
lrwxrwxrwx 1 at570 at570 17 Mar 10 16:20 matrix-prep -> ../../matrix-prep
```

The setting "inpdirs/\*" will cause all input directories to be used. The entries in the `inpdirs` directory should be set as needed for the execution of the custom pipeline step.

```
1 set filter = "*.res_40kb"
```

The 'filter' setting to be used when parsing the 'branches' of the input directory results, for inclusion in the execution of the pipeline step. In this example, only input branches that match the pattern "\*.res\_40kb" will be included. In this example, the following input branches are available:

```
1 hicseq.analysis-for-hicbench/pipeline/domains$ ls -l inpdirs/matrix-filtered/results/
drwxr-xr-x 3 at570 at570 43 Mar 11 14:43 matrix-filtered.by_sample.res_1000kb
3 drwxr-xr-x 3 at570 at570 43 Mar 11 14:44 matrix-filtered.by_sample.res_100kb
drwxr-xr-x 3 at570 at570 43 Mar 11 14:44 matrix-filtered.by_sample.res_10kb.maxd_5Mb.rotate45
5 drwxr-xr-x 3 at570 at570 43 Mar 11 14:45 matrix-filtered.by_sample.res_40kb
```

Based on the given 'filter' setting, only the following branch will be included:

```
1 drwxr-xr-x 3 at570 at570 43 Mar 11 14:45 matrix-filtered.by_sample.res_40kb
```

This allows for the exclusion of unnecessary analysis branches.

```
1 set resources = 1,20G
```

This sets the number of computer resources to be reserved by `qsub`, listed as CPU cores and GB of RAM. If RAM is not a concern, only CPU cores need to be listed. A range of values can be used for CPU cores, such as 8-64, though the utility of this depends on many factors related to your high-performance computing infrastructure and the specifics of the program being run; more cores may not necessarily speed up execution of the task at hand.

```
1 set cmd = "./code/code.main/scripts-qsub-wrapper $resources ./code/hicseq-$op.tcsh"
```

This line does not need to be modified by the user, but should be noted since it refers to the file in the `code` directory that will be created later and used to execute the program used in the pipeline step. Importantly, the entry `./code/hicseq-$op.tcsh` in this case refers to the file `./code/hicseq-domains.tcsh`.

```
1 Rscript ./code/code.main/pipeline-master-explorer.r -v -F "$filter" "$cmd" $results/$op "params/params.*.tcsh" "$inpdirs" "" "sample" 1
```

Since this calls the settings that have already been made, this line of the 'run' file does not need to be edited unless the grouping and splitting variables need to be changed. In this case, the command uses the following arguments (as per Section 5.3):

```
1 pipeline-master-explorer.r [OPTIONS] SCRIPT OUTDIR-PREFIX PARAM-SCRIPTS INPUT-BRANCHES SPLIT-VARIABLE OUTPUT-OBJECT-VARIABLE TUPLES
```

Importantly, the 'split-variable' and 'output-object-variable' come from the headings of columns used as grouping factors in the `inputs/sample-sheet.tsv` file for the analysis; custom grouping factors can be included in the sample sheet and used here. The output of the `pipeline-master-explorer.r` script is stored in the file `results/.db/run` which is created when the run file is executed (the command `./run--dry-run` can be used to generate this without running the commands). An example entry will look like this:

```
1 hicseq.analysis-for-hicbench/pipeline/domains$ head -n 1 results/.db/run
./code/code.main/scripts-qsub-wrapper 1,20G ./code/hicseq-domains.tcsh results/domains.by_sample.
armatus.gamma_0.5/matrix-prep.by_sample.scale/matrix-filtered.by_sample.res_40kb/filter.
by_sample.standard/align.by_sample.bowtie2/CD34-HindIII-rep1 params/params.armatus.gamma_0.5.
tcsh inpdirs/matrix-prep/results/matrix-prep.by_sample.scale/matrix-filtered.by_sample.res_40kb/
filter.by_sample.standard/align.by_sample.bowtie2 'CD34-HindIII-rep1'
```

During pipeline step execution, these lines will be submitted to `qsub` by the script `./code/code.main/scripts-qsub-wrapper`.

4. Next, the parameter files must be set for the new pipeline step. These files are contained in the `params` directory:

```
1 hicseq.analysis-for-hicbench/pipeline/domains$ ls -l params/
2 -rwxr-xr-x 1 at570 at570 131 Mar 10 16:20 params.armatus.gamma_0.5.tcsh
3 -rwxr-xr-x 1 at570 at570 480 Mar 10 16:20 params.hicmatrix.tcsh
4 -rwxr-xr-x 1 at570 at570 155 Mar 10 16:20 params.topdom.tcsh
```

Importantly, files must use the following naming scheme: `params.<name>.tcsh`. All files included in the `params` directory following this naming scheme will be evaluated as a separate 'branch' for analysis. An example parameters file looks like this:

```
1 hicseq.analysis-for-hicbench/pipeline/domains$ cat params/params.armatus.gamma_0.5.tcsh
2 #!/bin/tcsh
3
4 source ./inputs/params/params.tcsh
5
6 set tool = armatus
7 set chrom_excluded = 'chr [MY]'
8 set armatus_params = "-g 0.5"
```



Settings that are specific to each analysis branch should be included in these files. Sub-directories in the `results` directory will be created for each entry in the `params` directory, as can be seen here:

```

1 hicseq.analysis-for-hicbench/pipeline/domains$ ls -l results/
2 drwxr-xr-x 7 at570 at570 246 Mar 18 20:48 domains.by_sample.armatus.gamma_0.5
3 drwxr-xr-x 7 at570 at570 246 Mar 18 20:48 domains.by_sample.hicmatrix
4 drwxr-xr-x 7 at570 at570 246 Mar 18 20:49 domains.by_sample.topdom

```

Note that in this case, the full output directory name comes from the following components: `<pipeline_step>.by_<output-object-variable>.<params_entry>`

5. A script containing the commands needed to run the desired program must be created and placed in the `code` directory, of which a partial list is shown below as an example:

```

1 hicseq.analysis-for-hicbench/pipeline/domains$ ls -l code/hic-
2 -rwxr-xr-x 1 at570 at570 26528 Dec 8 11:42 code/hic-matrix.o
3 -rwxr-xr-x 1 at570 at570 117660 Mar 18 15:25 code/hic-matrix.r
4 -rwxr-xr-x 1 at570 at570 24440 Dec 8 11:42 code/hic-matrix.so
5 -rwxr-xr-x 1 at570 at570 2471 Mar 10 16:20 code/hicnorm-cis.r
6 -rwxr-xr-x 1 at570 at570 2542 Mar 10 16:20 code/hicseq-align.tcsh
7 -rwxr-xr-x 1 at570 at570 2352 Mar 10 16:20 code/hicseq-annotate-tables.tcsh
8 -rwxr-xr-x 1 at570 at570 3463 Mar 21 19:28 code/hicseq-annotations-enrichments.r
9 -rwxr-xr-x 1 at570 at570 1547 Mar 21 18:54 code/hicseq-annotations-stats.tcsh
10 -rwxr-xr-x 1 at570 at570 1274 Mar 10 16:20 code/hicseq-annotations.tcsh
11 -rwxr-xr-x 1 at570 at570 2098 Mar 14 17:04 code/hicseq-boundary-scores-pca.tcsh
12 -rwxr-xr-x 1 at570 at570 1649 Mar 10 16:20 code/hicseq-boundary-scores.tcsh
13 -rwxr-xr-x 1 at570 at570 1440 Mar 10 16:20 code/hicseq-compare-boundaries-stats.tcsh
14 -rwxr-xr-x 1 at570 at570 3138 Mar 10 16:20 code/hicseq-compare-boundaries.tcsh
15 -rwxr-xr-x 1 at570 at570 1362 Mar 10 16:20 code/hicseq-compare-matrices-stats.tcsh
16 -rwxr-xr-x 1 at570 at570 1596 Mar 10 16:20 code/hicseq-compare-matrices.tcsh
17 -rwxr-xr-x 1 at570 at570 1902 Mar 10 16:20 code/hicseq-diff-domains.tcsh

```

Importantly, the primary script must follow this naming scheme: `hicseq-<pipeline_step>.tcsh`. In this example, this would correspond to `hicseq-domains.tcsh`. Pre-existing scripts can be used as a template to set up your custom script. This example script has the following contents:

```

1 hicseq.analysis-for-hicbench/pipeline/domains$ cat code/hicseq-domains.tcsh
2 #!/bin/tcsh
3 source ./code/code.main/custom-tcshrc # shell settings
4
5 ##
6 ## USAGE: hicseq-domains.tcsh OUTPUT-DIR PARAM-SCRIPT BRANCH OBJECT(S)
7 ##
8
9 if ($#argv != 4) then
10     grep '^##' $0
11     exit
12 endif
13
14 set outdir = $1
15 set params = $2
16 set branch = $3
17 set objects = ($4)
18
19 # read variables from input branch
20 source ./code/code.main/scripts-read-job-vars $branch "$objects" "genome genome_dir bin_size"
21
22 # run parameter script
23 source $params
24
25 # create path
26 scripts-create-path $outdir/
27
28 # -----
29 # ----- MAIN CODE BELOW -----
30 # -----
31
32 # Run domains
33 if (($tool == armatus) || ($tool == di) || ($tool == topdom) || ($tool == caltads) || ($tool == hicmatrix))
34     then
35     ./code/hicseq-domains-$tool.tcsh $outdir $params $branch "$objects"
36 else

```

```

37     scripts--send2err "Error: unknown domain caller tool $tool."
      exit 1
    endif
39
41 # ----- MAIN CODE ABOVE -----
43
45 # save variables
    source ./code/code.main/scripts--save-job-vars
47
    # done
    scripts--send2err "Done."

```

The preamble of the script should require little user intervention, while the bulk of the user's custom pipeline code should be inserted between the 'MAIN CODE' blocks specified within the document. For reference on how to structure your custom code, compare the 'USAGE' entry with the evaluated command to be passed to the script in the `results/.db/run` file. For convenience, the sample entry is repeated below:

```

2 hicseq.analysis--for--hicbench/pipeline/domains$ head -n 1 results/.db/run
  ./code/code.main/scripts--qsub-wrapper 1,20G ./code/hicseq--domains.tcsh results/domains.by_sample.armatus.
  gamma_0.5/matrix--prep.by_sample.scale/matrix--filtered.by_sample.res_40kb/filter.by_sample.standard/
  align.by_sample.bowtie2/CD34-HindIII--rep1 params/params.armatus.gamma_0.5.tcsh inpdirs/matrix--prep/
  results/matrix--prep.by_sample.scale/matrix--filtered.by_sample.res_40kb/filter.by_sample.standard/
  align.by_sample.bowtie2 'CD34-HindIII--rep1'

```

While this primary script should be in the `.tcsh` format, subsequent scripts in the user's preferred language can be called. They should follow the same naming conventions as shown in the `code` directory example above.

## 4 HiC-Seq Pipeline

### 4.1 Pipeline Steps

Within the parent directory of an analysis, the default pipeline steps are listed as symlinks, in alpha-numeric order starting with "\_\_\_", as seen here:

```
lrwxrwxrwx 1 at570 14 Feb 7 17:06 ___01a-align -> pipeline/align
2 lrwxrwxrwx 1 at570 15 Feb 7 17:06 ___02a-filter -> pipeline/filter
lrwxrwxrwx 1 at570 21 Feb 7 17:06 ___02b-filter-stats -> pipeline/filter-stats
4 lrwxrwxrwx 1 at570 15 Feb 7 17:06 ___03a-tracks -> pipeline/tracks
lrwxrwxrwx 1 at570 24 Feb 7 17:06 ___04a-matrix-filtered -> pipeline/matrix-filtered
6 lrwxrwxrwx 1 at570 20 Feb 7 17:06 ___05a-matrix-prep -> pipeline/matrix-prep
lrwxrwxrwx 1 at570 18 Feb 7 17:06 ___06a-matrix-ic -> pipeline/matrix-ic
8 lrwxrwxrwx 1 at570 23 Feb 7 17:06 ___07a-matrix-hicnorm -> pipeline/matrix-hicnorm
lrwxrwxrwx 1 at570 21 Feb 7 17:06 ___08a-matrix-stats -> pipeline/matrix-stats
10 lrwxrwxrwx 1 at570 25 Feb 7 17:06 ___09a-compare-matrices -> pipeline/compare-matrices
lrwxrwxrwx 1 at570 31 Feb 7 17:06 ___09b-compare-matrices-stats -> pipeline/compare-matrices-stats
12 lrwxrwxrwx 1 at570 24 Feb 7 17:06 ___10a-boundary-scores -> pipeline/boundary-scores
lrwxrwxrwx 1 at570 28 Feb 7 17:06 ___10b-boundary-scores-pca -> pipeline/boundary-scores-pca
14 lrwxrwxrwx 1 at570 16 Feb 7 17:06 ___11a-domains -> pipeline/domains
lrwxrwxrwx 1 at570 27 Feb 7 17:06 ___12a-compare-boundaries -> pipeline/compare-boundaries
16 lrwxrwxrwx 1 at570 33 Feb 7 17:06 ___12b-compare-boundaries-stats -> pipeline/compare-boundaries-stats
lrwxrwxrwx 1 at570 19 Feb 7 17:06 ___13a-hicplotter -> pipeline/hicplotter
18 lrwxrwxrwx 1 at570 21 Feb 7 17:06 ___14a-interactions -> pipeline/interactions
lrwxrwxrwx 1 at570 20 Feb 7 17:06 ___15a-annotations -> pipeline/annotations
20 lrwxrwxrwx 1 at570 30 Feb 8 17:47 code -> code.repo/code.hicseq-standard
lrwxrwxrwx 1 at570 14 Nov 12 11:55 code.main -> code/code.main
22 drwxr-xr-x 9 at570 209 Jan 9 10:16 code.repo
lrwxrwxrwx 1 at570 103 Feb 8 17:47 data -> /ifs/home/.../data
24 drwxr-xr-x 6 at570 258 Jan 5 09:24 inputs
drwxr-xr-x 24 at570 799 Feb 7 17:06 pipeline
26 -rwxr-xr-x 1 at570 210 Dec 2 14:23 psync
-rwxr-xr-x 1 at570 981 Jan 5 19:40 run
28 -rwxr-xr-x 1 at570 554 Dec 18 17:02 run.dry
-rwxr-xr-x 1 at570 988 Jan 24 14:42 run.subset
30 -rwxr-xr-x 1 at570 165 Dec 26 08:09 run.usage
```

This functions in informing the user of the order of pipeline steps. Each symlink points back to a directory in the pipeline directory for the corresponding pipeline step, as shown here:

```
pipeline$
2 total 814K
drwxr-xr-x 4 at570 203 Jan 19 15:50 align
4 drwxr-xr-x 5 at570 207 Jan 19 22:12 annotations
drwxr-xr-x 5 at570 387 Feb 6 17:46 boundary-scores
6 drwxr-xr-x 5 at570 243 Feb 7 14:17 boundary-scores-pca
lrwxrwxrwx 1 at570 7 Dec 2 12:39 code -> ../code
8 lrwxrwxrwx 1 at570 12 Dec 2 12:39 code.main -> ../code.main
drwxr-xr-x 5 at570 390 Jan 19 22:08 compare-boundaries
10 drwxr-xr-x 5 at570 396 Jan 20 10:59 compare-boundaries-stats
drwxr-xr-x 5 at570 435 Jan 19 16:04 compare-matrices
12 drwxr-xr-x 6 at570 419 Jan 19 16:05 compare-matrices-stats
drwxr-xr-x 5 at570 445 Jan 19 22:10 diff-domains
14 drwxr-xr-x 5 at570 379 Jan 20 13:06 domains
drwxr-xr-x 5 at570 229 Jan 19 16:19 filter
16 drwxr-xr-x 6 at570 256 Jan 19 15:53 filter-stats
drwxr-xr-x 5 at570 206 Jan 19 22:11 hicplotter
18 -rw-r--r-- 1 at570 297 Feb 6 17:52 index.txt
lrwxrwxrwx 1 at570 9 Dec 2 12:39 inputs -> ../inputs
20 drwxr-xr-x 5 at570 208 Jan 19 22:12 interactions
drwxr-xr-x 5 at570 239 Jan 19 16:01 matrix-estimated
22 drwxr-xr-x 5 at570 238 Jan 19 16:08 matrix-filtered
drwxr-xr-x 5 at570 232 Jan 19 16:00 matrix-ic
24 drwxr-xr-x 5 at570 234 Jan 19 15:59 matrix-prep
drwxr-xr-x 5 at570 208 Jan 19 16:03 matrix-stats
26 lrwxrwxrwx 1 at570 8 Dec 3 14:56 psync -> ../psync
drwxr-xr-x 4 at570 158 Dec 22 17:44 template
28 drwxr-xr-x 5 at570 229 Jan 19 15:55 tracks
```

The pipeline directory contains files and symlinks needed for each step in the pipeline. The steps to be executed are defined in two ways:

1. A file called 'index.txt' lists the names of each step in the pipeline, in the order in which they will be completed. This file is located in the 'pipeline' directory.
2. A subdirectory within the 'pipeline' directory with the same name as its corresponding entry in the 'index.txt' file must be included to hold the parameters and commands to be run, and the results produced.

Index file:

```

pipeline /index.txt$
2 align
4 filter
  filter -stats
6 tracks
8 matrix-filtered
10 matrix-prep
12 matrix-ic
14 #matrix-estimated
16 #
  matrix-stats
18 compare-matrices
20 compare-matrices-stats
22 boundary-scores
  boundary-scores-pca
24 domains
26 compare-boundaries
28 compare-boundaries-stats
30 #diff-domains
  #
32 hicplotter
34 interactions
36 annotations

```

Steps listed in 'index.txt' which have been commented out (i.e. start with a # character) will not be included in the analysis. Custom pipeline steps can be easily included by adding the corresponding entry to the 'index.txt' and creating a subdirectory within the 'pipeline' directory.

For details on adding custom pipeline steps, see Section ??

#### 4.1.1 Default Parameters

These parameters are used by default across pipeline steps.

```

/inputs/params/params.tcsh$
2 #!/bin/tcsh
4 # load basic tools
  module unload samtools
6  module unload java
  module unload gcc
8  module unload python
  module load samtools/1.2.1
10  module load bedtools/2.22.0
  module load java/1.7
12  module load picard-tools
14 # load tools required for each step of the pipeline (this can be overridden in local param scripts)
  module load bowtie2/2.2.6
16  module load armatus/2014-05-19
  module load caltads/0.1.0

```

```

18 module load ghmm/0.9
20 # sample sheet file
set sheet = inputs/sample-sheet.tsv

```

### 4.1.2 Pipeline Step Execution Flowchart

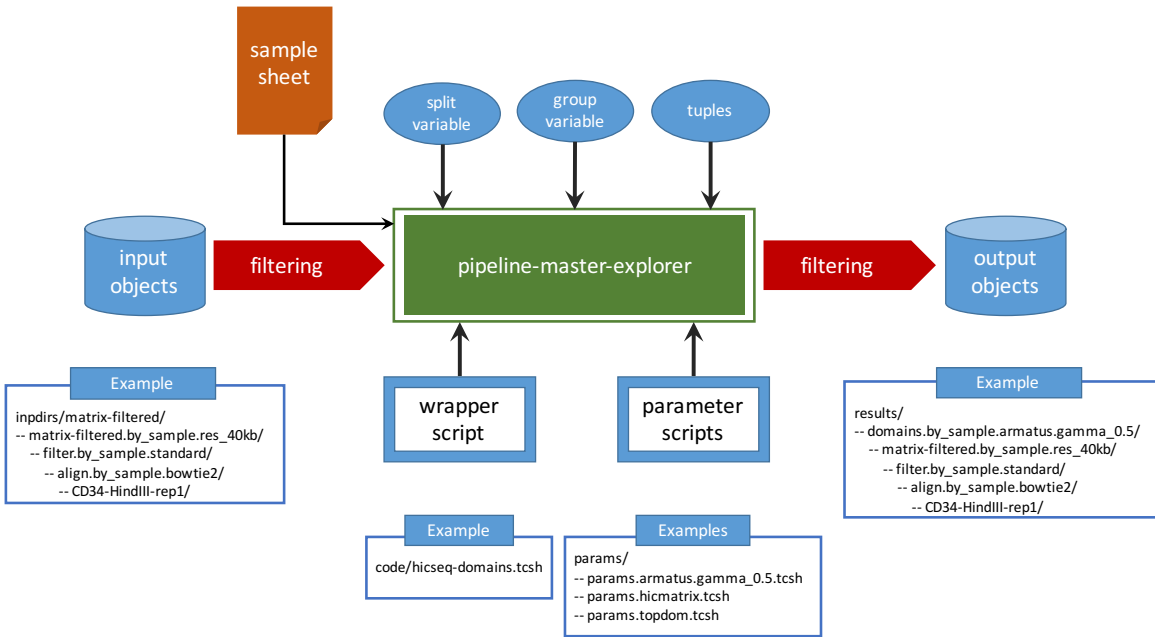

**Figure 2:** Overview of pipeline step execution for default analysis steps. See Section 4.1.2.

## 4.2 Alignment

### 4.2.1 Input

Raw data in fastq or fastq.gz files (Section 2.4).

### 4.2.2 Analysis

Default parameters:

```
1 params.bowtie2.tcsh$  
2 #!/bin/tcsh  
3  
4 source ./inputs/params/params.tcsh  
5  
6 set aligner = bowtie2  
7 set genome = `./code/read-sample-sheet.tcsh $sheet $object genome`  
8 set genome_index = inputs/genomes/$genome/bowtie2.index/genome  
9 set align_params = "--very-sensitive-local --local"
```

### 4.2.3 Output

Default output:

```
1 -rw-r--r-- 1 at570 49G Jan 13 01:02 alignments.bam  
2 -rw-r--r-- 1 at570 473 Jan 13 01:02 job.err  
3 -rw-r--r-- 1 at570 47 Jan 12 18:42 job.id  
4 -rw-r--r-- 1 at570 0 Jan 12 18:42 job.out  
5 -rw-r--r-- 1 at570 136 Jan 12 18:42 job.sh  
6 -rw-r--r-- 1 at570 2.3K Jan 13 01:02 job.vars.tsv
```

## 4.3 Filter

### 4.3.1 Input

Data from the pipeline `align` step is used as input (Section 4.2).

### 4.3.2 Analysis

Default parameters:

```
params.standard.tcsh$
2 #!/bin/tcsh
4 source ./inputs/params/params.tcsh
6 set filter_params = "--mapq 30 --min-dist 25000 --max-offset 500 --filter-dups"
```

### 4.3.3 Output

Default output:

```
-rw-r--r-- 1 at570 1.7G Jan 13 14:26 filtered.reg.gz
2 -rw-r--r-- 1 at570 65K Jan 13 14:25 job.err
-rw-r--r-- 1 at570 47 Jan 13 13:15 job.id
4 -rw-r--r-- 1 at570 0 Jan 13 13:15 job.out
-rw-r--r-- 1 at570 195 Jan 13 13:15 job.sh
6 -rw-r--r-- 1 at570 2.1K Jan 13 14:26 job.vars.tsv
-rw-r--r-- 1 at570 378 Jan 13 14:24 stats.tsv
```

## 4.4 Filter Stats

### 4.4.1 Input

Data from the pipeline `filter` step is used as input (Section 4.3).

### 4.4.2 Analysis

Default parameters:

```
1 params.standard.tcsh$  
2 #!/bin/tcsh  
3 source ./inputs/params/params.tcsh
```

### 4.4.3 Output

See Figure 3 and Figure 4. Default output:

```
1 -rw-r--r-- 1 at570 6.5K Feb 11 15:27 counts.pdf  
2 -rw-r--r-- 1 at570 34 Feb 11 15:27 job.err  
3 -rw-r--r-- 1 at570 47 Feb 11 15:27 job.id  
4 -rw-r--r-- 1 at570 52 Feb 11 15:27 job.out  
5 -rw-r--r-- 1 at570 226 Feb 11 15:27 job.sh  
6 -rw-r--r-- 1 at570 6.7K Feb 11 15:27 percent.pdf
```



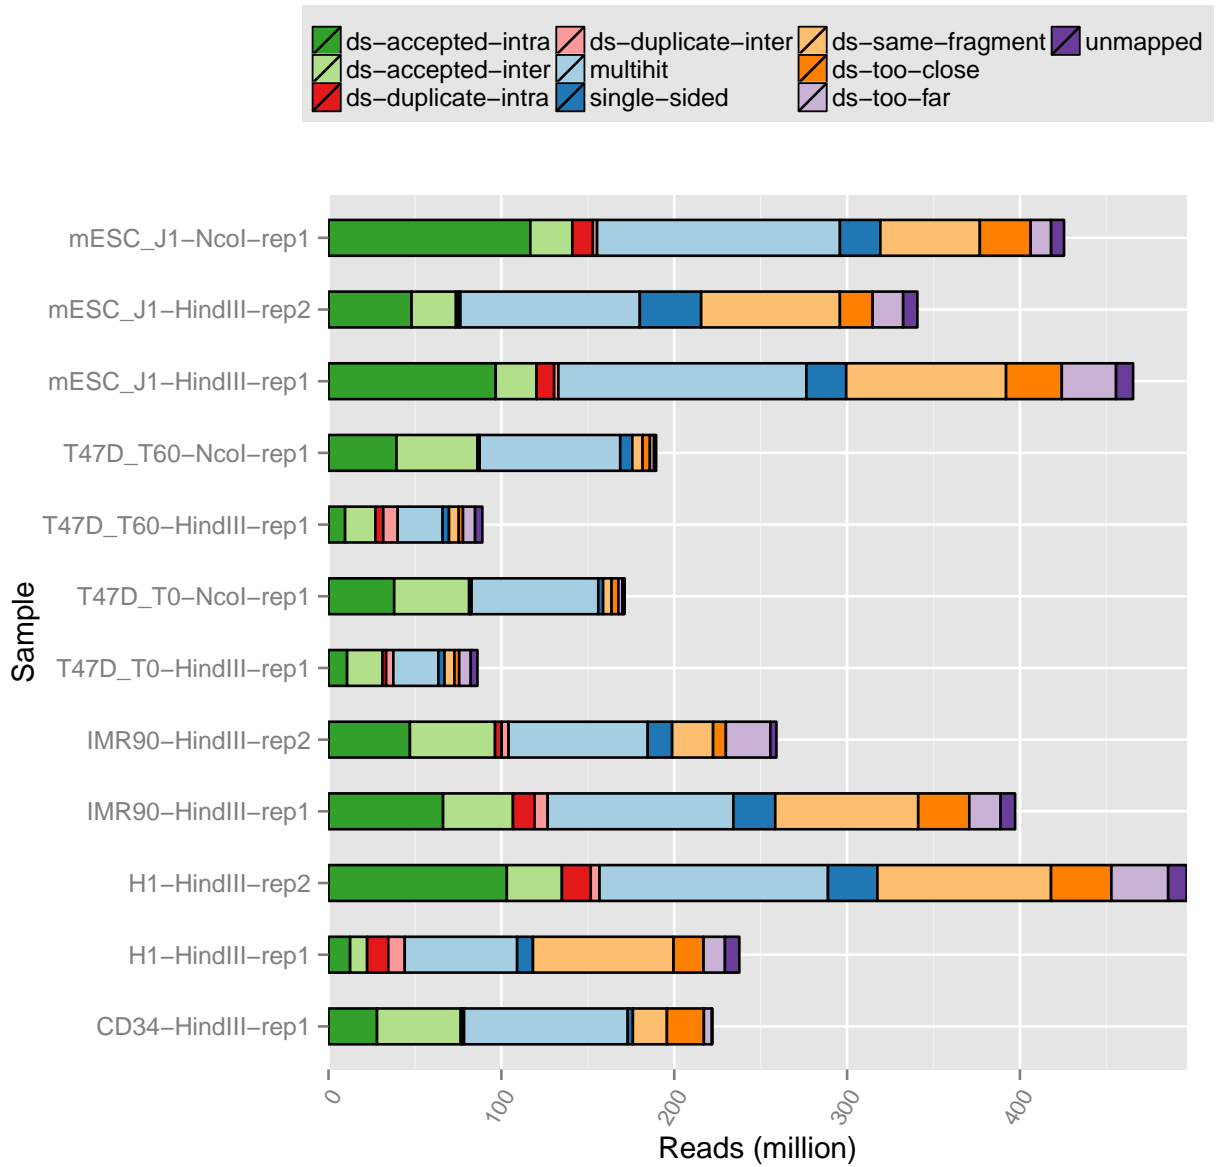

**Figure 3:** Filter Stats counts sample output

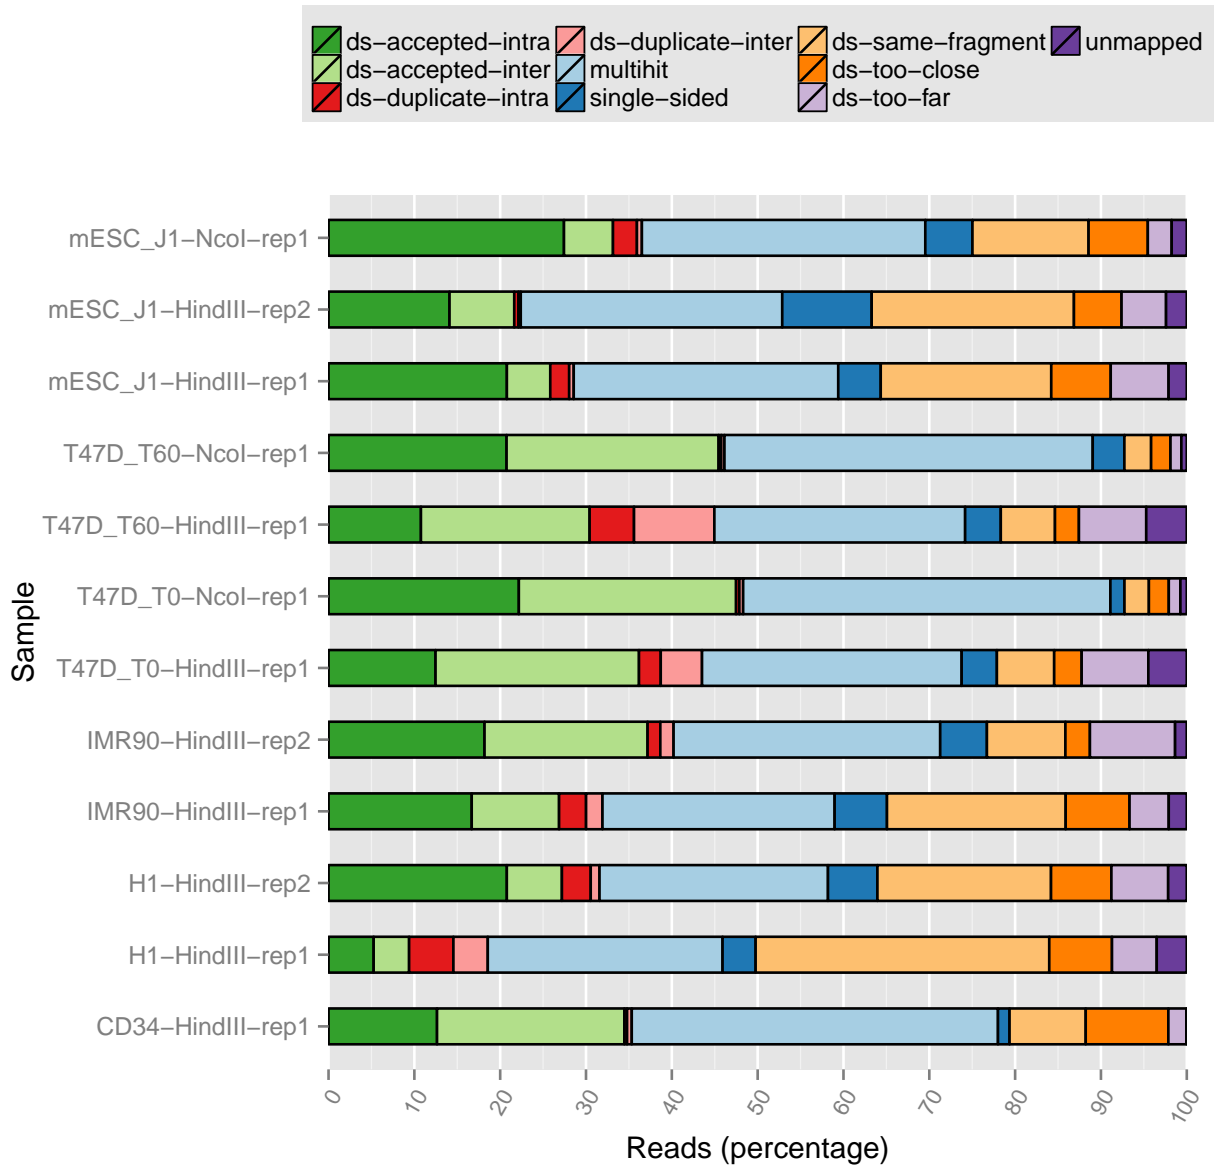

**Figure 4:** Filter Stats percentage sample output

## 4.5 Tracks

### 4.5.1 Input

Data from the pipeline `filter` step is used as input (Section 4.3).

### 4.5.2 Analysis

Default parameters:

```
params.standard.tcsh$
2 #!/bin/tcsh
4 source ./inputs/params/params.tcsh
6 set bin_size = 40000 # this is a commonly used bin size
```

### 4.5.3 Output

Default output:

```
-rw-r--r-- 1 at570 4.1K Jan 13 15:55 job.err
2 -rw-r--r-- 1 at570 47 Jan 13 15:10 job.id
-rw-r--r-- 1 at570 0 Jan 13 15:11 job.out
4 -rw-r--r-- 1 at570 242 Jan 13 15:10 job.sh
-rw-r--r-- 1 at570 2.6K Jan 13 15:55 job.vars.tsv
6 -rw-r--r-- 1 at570 1.1G Jan 13 15:54 track.washu.tsv.gz
-rw-r--r-- 1 at570 789K Jan 13 15:55 track.washu.tsv.gz.tbi
```

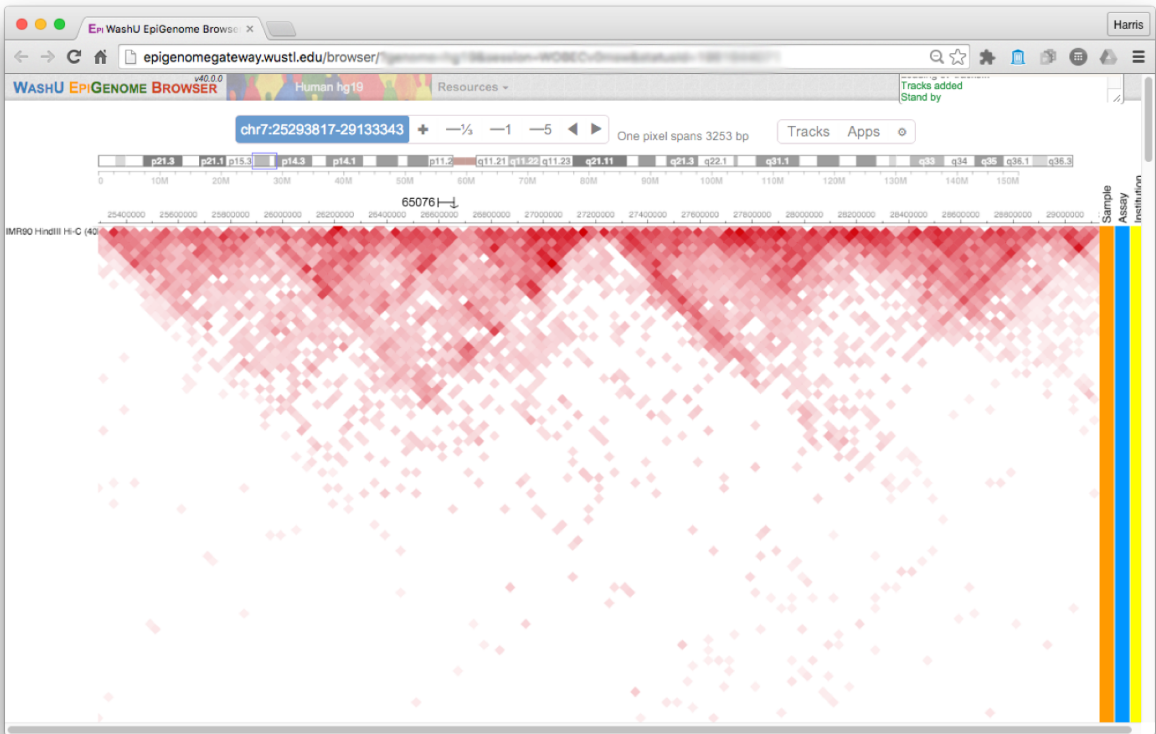

**Figure 5:** WashU tracks loaded in browser.

## 4.6 Matrix Filtered

### 4.6.1 Input

Data from the pipeline `filter` step is used as input (Section 4.3).

### 4.6.2 Analysis

Default parameters files:

```
1 -rwxr-xr-x 1 at570 195 Nov 24 11:20 params.res_1000kb.tcsh
2 -rwxr-xr-x 1 at570 194 Nov 25 15:11 params.res_100kb.tcsh
3 -rwxr-xr-x 1 at570 210 Dec 1 12:41 params.res_10kb.maxd_5Mb.rotate45.tcsh
4 -rwxr-xr-x 1 at570 193 Nov 30 16:22 params.res_10kb.tcsh
5 -rwxr-xr-x 1 at570 193 Nov 24 11:20 params.res_40kb.tcsh
```

Default parameters:

```
1 params.res_1000kb.tcsh$
2 #!/bin/tcsh
3
4 source ./inputs/params/params.tcsh
5
6 set bin_size = 1000000
7 set max_dist = 0
8 set ref = $genome_dir/genome.bed
9 set matrix_params = "--bin-size $bin_size --max-dist $max_dist -R $ref"
```

```
1 params.res_100kb.tcsh$
2 #!/bin/tcsh
3
4 source ./inputs/params/params.tcsh
5
6 set bin_size = 100000
7 set max_dist = 0
8 set ref = $genome_dir/genome.bed
9 set matrix_params = "--bin-size $bin_size --max-dist $max_dist -R $ref"
```

```
1 params.res_10kb.maxd_5Mb.rotate45.tcsh$
2 #!/bin/tcsh
3
4 source ./inputs/params/params.tcsh
5
6 set bin_size = 10000
7 set max_dist = 5000000
8 set ref = $genome_dir/genome.bed
9 set matrix_params = "--bin-size $bin_size --max-dist $max_dist --rotate45 -R $ref"
```

```
1 params.res_10kb.tcsh
2 #!/bin/tcsh
3
4 source ./inputs/params/params.tcsh
5
6 set bin_size = 10000
7 set max_dist = 0
8 set ref = $genome_dir/genome.bed
9 set matrix_params = "--bin-size $bin_size --max-dist $max_dist -R $ref"
```

```
1 params.res_40kb.tcsh$
2 #!/bin/tcsh
3
4 source ./inputs/params/params.tcsh
```

```

5 set bin_size = 40000
7 set max_dist = 0
set ref = $genome_dir/genome.bed
9 set matrix_params = "--bin-size $bin_size --max-dist $max_dist -R $ref"

```

### 4.6.3 Output

Default output:

```

1 -rw-r--r-- 1 at570 56K Jan 13 15:57 ignored_loci.txt
-rw-r--r-- 1 at570 9.6K Jan 13 16:02 job.err
3 -rw-r--r-- 1 at570 47 Jan 13 15:57 job.id
-rw-r--r-- 1 at570 0 Jan 13 15:57 job.out
5 -rw-r--r-- 1 at570 266 Jan 13 15:57 job.sh
-rw-r--r-- 1 at570 2.7K Jan 13 16:02 job.vars.tsv
7 -rw-r--r-- 1 at570 75M Jan 13 16:01 matrix.chr1.tsv
-rw-r--r-- 1 at570 23M Jan 13 16:01 matrix.chr10.tsv
9 -rw-r--r-- 1 at570 22M Jan 13 16:01 matrix.chr11.tsv
-rw-r--r-- 1 at570 22M Jan 13 16:01 matrix.chr12.tsv
11 -rw-r--r-- 1 at570 16M Jan 13 16:01 matrix.chr13.tsv
-rw-r--r-- 1 at570 14M Jan 13 16:01 matrix.chr14.tsv
13 -rw-r--r-- 1 at570 13M Jan 13 16:01 matrix.chr15.tsv
-rw-r--r-- 1 at570 9.9M Jan 13 16:01 matrix.chr16.tsv
15 -rw-r--r-- 1 at570 8.0M Jan 13 16:01 matrix.chr17.tsv
-rw-r--r-- 1 at570 7.4M Jan 13 16:01 matrix.chr18.tsv
17 -rw-r--r-- 1 at570 4.3M Jan 13 16:01 matrix.chr19.tsv
-rw-r--r-- 1 at570 71M Jan 13 16:01 matrix.chr2.tsv
19 -rw-r--r-- 1 at570 4.9M Jan 13 16:01 matrix.chr20.tsv
-rw-r--r-- 1 at570 2.9M Jan 13 16:01 matrix.chr21.tsv
21 -rw-r--r-- 1 at570 3.3M Jan 13 16:01 matrix.chr22.tsv
-rw-r--r-- 1 at570 48M Jan 13 16:01 matrix.chr3.tsv
23 -rw-r--r-- 1 at570 44M Jan 13 16:01 matrix.chr4.tsv
-rw-r--r-- 1 at570 40M Jan 13 16:01 matrix.chr5.tsv
25 -rw-r--r-- 1 at570 36M Jan 13 16:02 matrix.chr6.tsv
-rw-r--r-- 1 at570 31M Jan 13 16:02 matrix.chr7.tsv
27 -rw-r--r-- 1 at570 26M Jan 13 16:02 matrix.chr8.tsv
-rw-r--r-- 1 at570 24M Jan 13 16:02 matrix.chr9.tsv
29 -rw-r--r-- 1 at570 29 Jan 13 16:02 matrix.chrM.tsv
-rw-r--r-- 1 at570 29M Jan 13 16:02 matrix.chrX.tsv
31 -rw-r--r-- 1 at570 4.3M Jan 13 16:02 matrix.chrY.tsv

```

## 4.7 Matrix Prep

### 4.7.1 Input

Data from the pipeline `matrix-filtered` step is used as input (Section 4.6).

### 4.7.2 Analysis

Default parameters:

```
1 params.scale_impute.tcsh$
2 #!/bin/tcsh
3
4 source ./inputs/params/params.tcsh
5
6 set chrom_excluded = 'chr[MY]' # excluded chromosomes
7 set prep_params = "--scale --impute"
```

### 4.7.3 Output

Default output:

```
1 drwxr-xr-x 2 at570 3.4K Jan 13 16:16 __jdata
2 -rw-r--r-- 1 at570 4.0K Jan 13 16:18 job.err
3 -rw-r--r-- 1 at570 47 Jan 13 16:14 job.id
4 -rw-r--r-- 1 at570 0 Jan 13 16:15 job.out
5 -rw-r--r-- 1 at570 345 Jan 13 16:14 job.sh
6 -rw-r--r-- 1 at570 3.3K Jan 13 16:18 job.vars.tsv
7 -rw-r--r-- 1 at570 371M Jan 13 16:17 matrix.chr1.tsv
8 -rw-r--r-- 1 at570 110M Jan 13 16:16 matrix.chr10.tsv
9 -rw-r--r-- 1 at570 109M Jan 13 16:15 matrix.chr11.tsv
10 -rw-r--r-- 1 at570 107M Jan 13 16:16 matrix.chr12.tsv
11 -rw-r--r-- 1 at570 80M Jan 13 16:16 matrix.chr13.tsv
12 -rw-r--r-- 1 at570 69M Jan 13 16:16 matrix.chr14.tsv
13 -rw-r--r-- 1 at570 63M Jan 13 16:16 matrix.chr15.tsv
14 -rw-r--r-- 1 at570 49M Jan 13 16:16 matrix.chr16.tsv
15 -rw-r--r-- 1 at570 40M Jan 13 16:16 matrix.chr17.tsv
16 -rw-r--r-- 1 at570 37M Jan 13 16:16 matrix.chr18.tsv
17 -rw-r--r-- 1 at570 21M Jan 13 16:16 matrix.chr19.tsv
18 -rw-r--r-- 1 at570 353M Jan 13 16:17 matrix.chr2.tsv
19 -rw-r--r-- 1 at570 24M Jan 13 16:16 matrix.chr20.tsv
20 -rw-r--r-- 1 at570 14M Jan 13 16:16 matrix.chr21.tsv
21 -rw-r--r-- 1 at570 16M Jan 13 16:16 matrix.chr22.tsv
22 -rw-r--r-- 1 at570 234M Jan 13 16:17 matrix.chr3.tsv
23 -rw-r--r-- 1 at570 219M Jan 13 16:17 matrix.chr4.tsv
24 -rw-r--r-- 1 at570 196M Jan 13 16:17 matrix.chr5.tsv
25 -rw-r--r-- 1 at570 175M Jan 13 16:17 matrix.chr6.tsv
26 -rw-r--r-- 1 at570 152M Jan 13 16:17 matrix.chr7.tsv
27 -rw-r--r-- 1 at570 128M Jan 13 16:17 matrix.chr8.tsv
28 -rw-r--r-- 1 at570 120M Jan 13 16:17 matrix.chr9.tsv
29 -rw-r--r-- 1 at570 144M Jan 13 16:17 matrix.chrX.tsv
```

## 4.8 Matrix IC

### 4.8.1 Input

Data from the pipeline `matrix-filtered` step is used as input (Section 4.6).

### 4.8.2 Analysis

Default parameters:

```
1 params.standard.tcsh$
2 #!/bin/tcsh
3
4 source ./inputs/params/params.tcsh
5
6 module unload gcc                # this is necessary in order to take care of module conflicts in our system
7 module unload python
8 module load python/2.7.3
9
10 set chrom_excluded = 'chr[MY]'   # excluded chromosomes
11 set cutoff = 0.05
```

### 4.8.3 Output

Default output:

```
1 drwxr-xr-x 2 at570 3.4K Jan 13 16:50 __jdata
2 -rw-r--r-- 1 at570 1.4K Jan 13 16:52 job.err
3 -rw-r--r-- 1 at570 47 Jan 13 16:47 job.id
4 -rw-r--r-- 1 at570 0 Jan 13 16:47 job.out
5 -rw-r--r-- 1 at570 333 Jan 13 16:47 job.sh
6 -rw-r--r-- 1 at570 3.5K Jan 13 16:52 job.vars.tsv
7 -rw-r--r-- 1 at570 371M Jan 13 16:50 matrix.chr1.tsv
8 -rw-r--r-- 1 at570 110M Jan 13 16:49 matrix.chr10.tsv
9 -rw-r--r-- 1 at570 109M Jan 13 16:49 matrix.chr11.tsv
10 -rw-r--r-- 1 at570 107M Jan 13 16:49 matrix.chr12.tsv
11 -rw-r--r-- 1 at570 80M Jan 13 16:49 matrix.chr13.tsv
12 -rw-r--r-- 1 at570 69M Jan 13 16:49 matrix.chr14.tsv
13 -rw-r--r-- 1 at570 63M Jan 13 16:49 matrix.chr15.tsv
14 -rw-r--r-- 1 at570 49M Jan 13 16:49 matrix.chr16.tsv
15 -rw-r--r-- 1 at570 40M Jan 13 16:49 matrix.chr17.tsv
16 -rw-r--r-- 1 at570 37M Jan 13 16:49 matrix.chr18.tsv
17 -rw-r--r-- 1 at570 21M Jan 13 16:49 matrix.chr19.tsv
18 -rw-r--r-- 1 at570 353M Jan 13 16:52 matrix.chr2.tsv
19 -rw-r--r-- 1 at570 24M Jan 13 16:49 matrix.chr20.tsv
20 -rw-r--r-- 1 at570 14M Jan 13 16:50 matrix.chr21.tsv
21 -rw-r--r-- 1 at570 16M Jan 13 16:50 matrix.chr22.tsv
22 -rw-r--r-- 1 at570 234M Jan 13 16:51 matrix.chr3.tsv
23 -rw-r--r-- 1 at570 219M Jan 13 16:51 matrix.chr4.tsv
24 -rw-r--r-- 1 at570 196M Jan 13 16:51 matrix.chr5.tsv
25 -rw-r--r-- 1 at570 175M Jan 13 16:51 matrix.chr6.tsv
26 -rw-r--r-- 1 at570 152M Jan 13 16:51 matrix.chr7.tsv
27 -rw-r--r-- 1 at570 128M Jan 13 16:51 matrix.chr8.tsv
28 -rw-r--r-- 1 at570 120M Jan 13 16:51 matrix.chr9.tsv
29 -rw-r--r-- 1 at570 144M Jan 13 16:51 matrix.chrX.tsv
```



## 4.9 Matrix HiCNorm

### 4.9.1 Input

Data from the pipeline `matrix-filtered` step is used as input (Section 4.6).

### 4.9.2 Analysis

Default parameters:

```
1 params.standard.tcsh$
2 #!/bin/tcsh
3
4 source ./inputs/params/params.tcsh
5
6 set chrom_excluded = 'chr[MY]'      # excluded chromosomes
```

### 4.9.3 Output

Default output:

```
1 drwxr-xr-x  2 at570  3.4K Feb  8 17:10 __jdata
2 -rw-r--r--  1 at570  13K Feb  8 17:25 job.err
3 -rw-r--r--  1 at570   47 Feb  8 17:06 job.id
4 -rw-r--r--  1 at570    0 Feb  8 17:06 job.out
5 -rw-r--r--  1 at570  343 Feb  8 17:06 job.sh
6 -rw-r--r--  1 at570  3.2K Feb  8 17:25 job.vars.tsv
7 -rw-r--r--  1 at570  86M Feb  8 17:19 matrix.chr1.tsv
8 -rw-r--r--  1 at570  28M Feb  8 17:10 matrix.chr10.tsv
9 -rw-r--r--  1 at570  28M Feb  8 17:12 matrix.chr11.tsv
10 -rw-r--r--  1 at570  28M Feb  8 17:10 matrix.chr12.tsv
11 -rw-r--r--  1 at570  21M Feb  8 17:09 matrix.chr13.tsv
12 -rw-r--r--  1 at570  18M Feb  8 17:09 matrix.chr14.tsv
13 -rw-r--r--  1 at570  16M Feb  8 17:09 matrix.chr15.tsv
14 -rw-r--r--  1 at570  13M Feb  8 17:09 matrix.chr16.tsv
15 -rw-r--r--  1 at570  9.7M Feb  8 17:09 matrix.chr17.tsv
16 -rw-r--r--  1 at570  11M Feb  8 17:09 matrix.chr18.tsv
17 -rw-r--r--  1 at570  5.3M Feb  8 17:08 matrix.chr19.tsv
18 -rw-r--r--  1 at570  85M Feb  8 17:25 matrix.chr2.tsv
19 -rw-r--r--  1 at570  6.6M Feb  8 17:10 matrix.chr20.tsv
20 -rw-r--r--  1 at570  3.6M Feb  8 17:09 matrix.chr21.tsv
21 -rw-r--r--  1 at570  3.8M Feb  8 17:09 matrix.chr22.tsv
22 -rw-r--r--  1 at570  58M Feb  8 17:17 matrix.chr3.tsv
23 -rw-r--r--  1 at570  55M Feb  8 17:20 matrix.chr4.tsv
24 -rw-r--r--  1 at570  49M Feb  8 17:15 matrix.chr5.tsv
25 -rw-r--r--  1 at570  44M Feb  8 17:15 matrix.chr6.tsv
26 -rw-r--r--  1 at570  38M Feb  8 17:17 matrix.chr7.tsv
27 -rw-r--r--  1 at570  33M Feb  8 17:14 matrix.chr8.tsv
28 -rw-r--r--  1 at570  29M Feb  8 17:13 matrix.chr9.tsv
29 -rw-r--r--  1 at570  34M Feb  8 17:15 matrix.chrX.tsv
```

## 4.10 Matrix Stats

### 4.10.1 Input

Data from the pipeline steps `matrix-filtered` (Section 4.6), `matrix-hicnorm` (Section 4.9), `matrix-prep` (Section 4.7), and `matrix-ic` (Section 4.8) are used as input.

### 4.10.2 Analysis

Default parameters:

```
1 params.standard.tcsh$
2 #!/bin/tcsh
3
4 source ./inputs/params/params.tcsh
5
6 set chrom_excluded = 'chr[MY]'           # excluded chromosomes
```

### 4.10.3 Output

See Figure 6. Default output:

```
1 -rw-r--r-- 1 at570 39K Feb 11 16:11 job.err
2 -rw-r--r-- 1 at570 47 Feb 11 15:48 job.id
3 -rw-r--r-- 1 at570 0 Feb 11 15:48 job.out
4 -rw-r--r-- 1 at570 480 Feb 11 15:48 job.sh
5 -rw-r--r-- 1 at570 5.3K Feb 11 16:11 job.vars.tsv
6 -rw-r--r-- 1 at570 59K Feb 11 16:11 stats.pdf
```

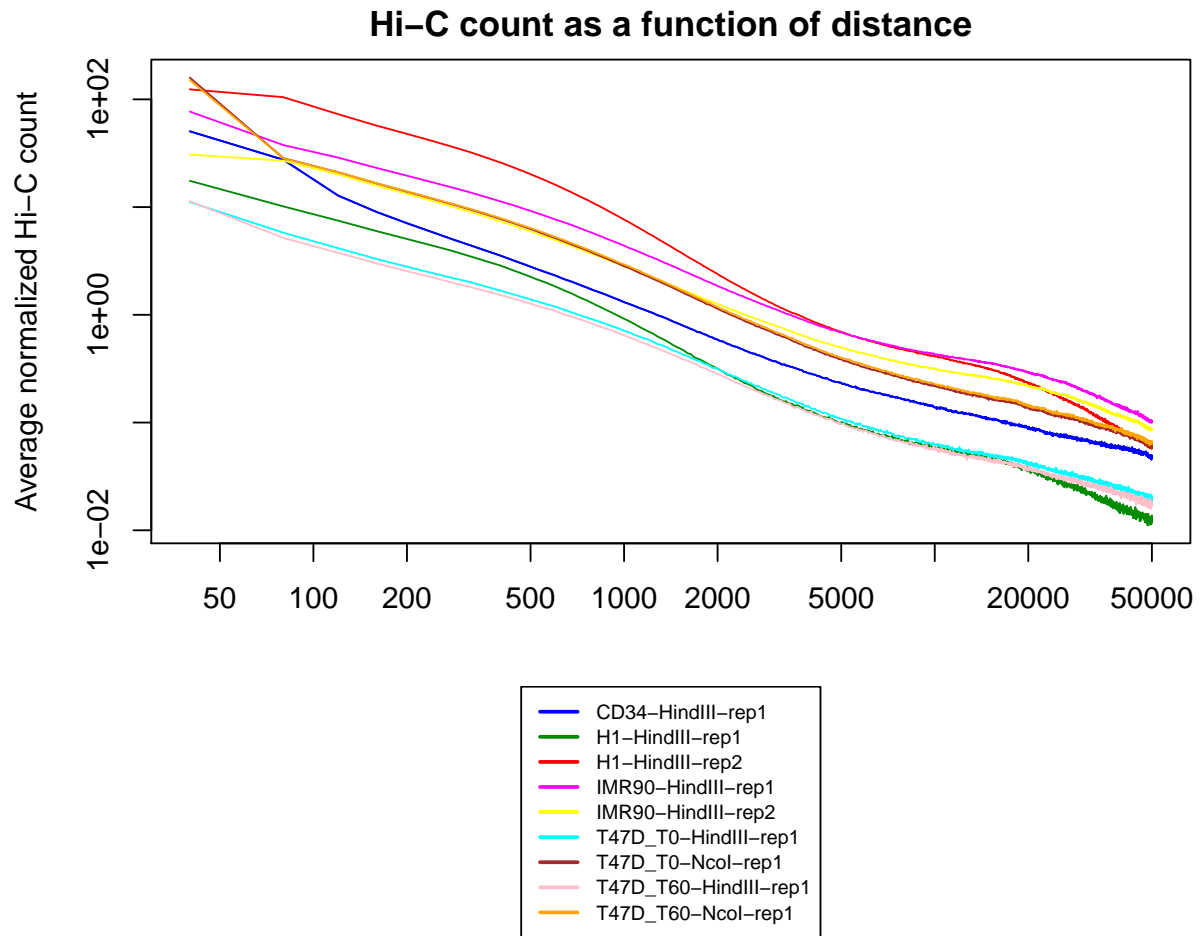

**Figure 6:** Matrix Stats sample output

## 4.11 Compare Matrices

### 4.11.1 Input

Data from the pipeline steps `matrix-filtered` (Section 4.6), `matrix-hicnorm` (Section 4.9), `matrix-prep` (Section 4.7), and `matrix-ic` (Section 4.8) are used as input.

### 4.11.2 Analysis

Default parameters:

```
params.standard.tcsh$
2 #!/bin/tcsh
4 source ./inputs/params/params.tcsh
6 set chrom_excluded = 'chr[MYX]'      # excluded chromosomes
8 set max_dist = `echo 10000000/$bin_size | bc`      # number of bins (max distance = 10Mb)
10 set compare_params = "--max-dist=$max_dist --n-dist=1 --min-lambda=0.0 --max-lambda=1.0 --n-lambda=6 --gamma=0"
    # only used if estimation was done with max-lambda=Inf
```

### 4.11.3 Output

Default output:

```
--rw-r--r-- 1 at570 17 Feb 9 01:26 chr1.cor.pearson.tsv
2 --rw-r--r-- 1 at570 17 Feb 9 01:26 chr1.cor.spearman.tsv
--rw-r--r-- 1 at570 17 Feb 9 01:27 chr10.cor.pearson.tsv
4 --rw-r--r-- 1 at570 17 Feb 9 01:27 chr10.cor.spearman.tsv
--rw-r--r-- 1 at570 17 Feb 9 01:28 chr11.cor.pearson.tsv
6 --rw-r--r-- 1 at570 17 Feb 9 01:28 chr11.cor.spearman.tsv
--rw-r--r-- 1 at570 17 Feb 9 01:28 chr12.cor.pearson.tsv
8 --rw-r--r-- 1 at570 17 Feb 9 01:28 chr12.cor.spearman.tsv
--rw-r--r-- 1 at570 17 Feb 9 01:29 chr13.cor.pearson.tsv
10 --rw-r--r-- 1 at570 17 Feb 9 01:29 chr13.cor.spearman.tsv
--rw-r--r-- 1 at570 17 Feb 9 01:29 chr14.cor.pearson.tsv
12 --rw-r--r-- 1 at570 17 Feb 9 01:29 chr14.cor.spearman.tsv
--rw-r--r-- 1 at570 17 Feb 9 01:30 chr15.cor.pearson.tsv
14 --rw-r--r-- 1 at570 17 Feb 9 01:30 chr15.cor.spearman.tsv
--rw-r--r-- 1 at570 17 Feb 9 01:30 chr16.cor.pearson.tsv
16 --rw-r--r-- 1 at570 17 Feb 9 01:30 chr16.cor.spearman.tsv
--rw-r--r-- 1 at570 17 Feb 9 01:31 chr17.cor.pearson.tsv
18 --rw-r--r-- 1 at570 17 Feb 9 01:31 chr17.cor.spearman.tsv
--rw-r--r-- 1 at570 17 Feb 9 01:31 chr18.cor.pearson.tsv
20 --rw-r--r-- 1 at570 17 Feb 9 01:31 chr18.cor.spearman.tsv
--rw-r--r-- 1 at570 17 Feb 9 01:31 chr19.cor.pearson.tsv
22 --rw-r--r-- 1 at570 17 Feb 9 01:31 chr19.cor.spearman.tsv
--rw-r--r-- 1 at570 17 Feb 9 01:33 chr2.cor.pearson.tsv
24 --rw-r--r-- 1 at570 17 Feb 9 01:33 chr2.cor.spearman.tsv
--rw-r--r-- 1 at570 17 Feb 9 01:33 chr20.cor.pearson.tsv
26 --rw-r--r-- 1 at570 17 Feb 9 01:33 chr20.cor.spearman.tsv
--rw-r--r-- 1 at570 17 Feb 9 01:33 chr21.cor.pearson.tsv
28 --rw-r--r-- 1 at570 17 Feb 9 01:33 chr21.cor.spearman.tsv
--rw-r--r-- 1 at570 17 Feb 9 01:33 chr22.cor.pearson.tsv
30 --rw-r--r-- 1 at570 17 Feb 9 01:33 chr22.cor.spearman.tsv
--rw-r--r-- 1 at570 17 Feb 9 01:35 chr3.cor.pearson.tsv
32 --rw-r--r-- 1 at570 17 Feb 9 01:35 chr3.cor.spearman.tsv
--rw-r--r-- 1 at570 17 Feb 9 01:36 chr4.cor.pearson.tsv
34 --rw-r--r-- 1 at570 17 Feb 9 01:36 chr4.cor.spearman.tsv
--rw-r--r-- 1 at570 17 Feb 9 01:37 chr5.cor.pearson.tsv
36 --rw-r--r-- 1 at570 17 Feb 9 01:37 chr5.cor.spearman.tsv
--rw-r--r-- 1 at570 17 Feb 9 01:38 chr6.cor.pearson.tsv
38 --rw-r--r-- 1 at570 17 Feb 9 01:38 chr6.cor.spearman.tsv
--rw-r--r-- 1 at570 17 Feb 9 01:39 chr7.cor.pearson.tsv
40 --rw-r--r-- 1 at570 17 Feb 9 01:39 chr7.cor.spearman.tsv
--rw-r--r-- 1 at570 17 Feb 9 01:40 chr8.cor.pearson.tsv
42 --rw-r--r-- 1 at570 17 Feb 9 01:40 chr8.cor.spearman.tsv
--rw-r--r-- 1 at570 17 Feb 9 01:41 chr9.cor.pearson.tsv
44 --rw-r--r-- 1 at570 17 Feb 9 01:41 chr9.cor.spearman.tsv
--rw-r--r-- 1 at570 1.9K Feb 9 01:41 cor.pearson.tsv
```

```
46 -rw-r--r-- 1 at570 1.9K Feb 9 01:41 cor.spearman.tsv
   -rw-r--r-- 1 at570 1.8K Feb 9 01:41 job.err
48 -rw-r--r-- 1 at570 47 Feb 8 18:22 job.id
   -rw-r--r-- 1 at570 0 Feb 9 01:25 job.out
50 -rw-r--r-- 1 at570 388 Feb 8 18:22 job.sh
   -rw-r--r-- 1 at570 3.1K Feb 9 01:41 job.vars.tsv
```

## 4.12 Compare Matrices Stats

### 4.12.1 Input

Data from the pipeline `compare-matrices` step is used as input (Section 4.11).

### 4.12.2 Analysis

Default parameters:

```
1 params.standard.tcsh$  
2 #!/bin/tcsh  
3 source ./inputs/params/params.tcsh
```

### 4.12.3 Output

See Figure 7, and See Figure 8. Default output:

```
1 -rw-r--r-- 1 at570 97 Feb 12 11:25 job.err  
2 -rw-r--r-- 1 at570 47 Feb 12 11:24 job.id  
3 -rw-r--r-- 1 at570 52 Feb 12 11:25 job.out  
4 -rw-r--r-- 1 at570 3.4K Feb 12 11:24 job.sh  
5 -rw-r--r-- 1 at570 44K Feb 12 11:25 job.vars.tsv  
6 drwxr-xr-x 2 at570 96 Feb 12 11:25 pearson  
7 drwxr-xr-x 2 at570 97 Feb 12 11:25 spearman
```

```
1 spearman/$  
2 -rw-r--r-- 1 at570 161K Feb 12 11:25 cor.spearman.tsv  
3 -rw-r--r-- 1 at570 8.9K Feb 12 11:25 correlograms.pdf  
4 -rw-r--r-- 1 at570 12K Feb 12 11:25 summary.tsv
```

```
1 pearson/$  
2 -rw-r--r-- 1 at570 159K Feb 12 11:25 cor.pearson.tsv  
3 -rw-r--r-- 1 at570 9.0K Feb 12 11:25 correlograms.pdf  
4 -rw-r--r-- 1 at570 12K Feb 12 11:25 summary.tsv
```

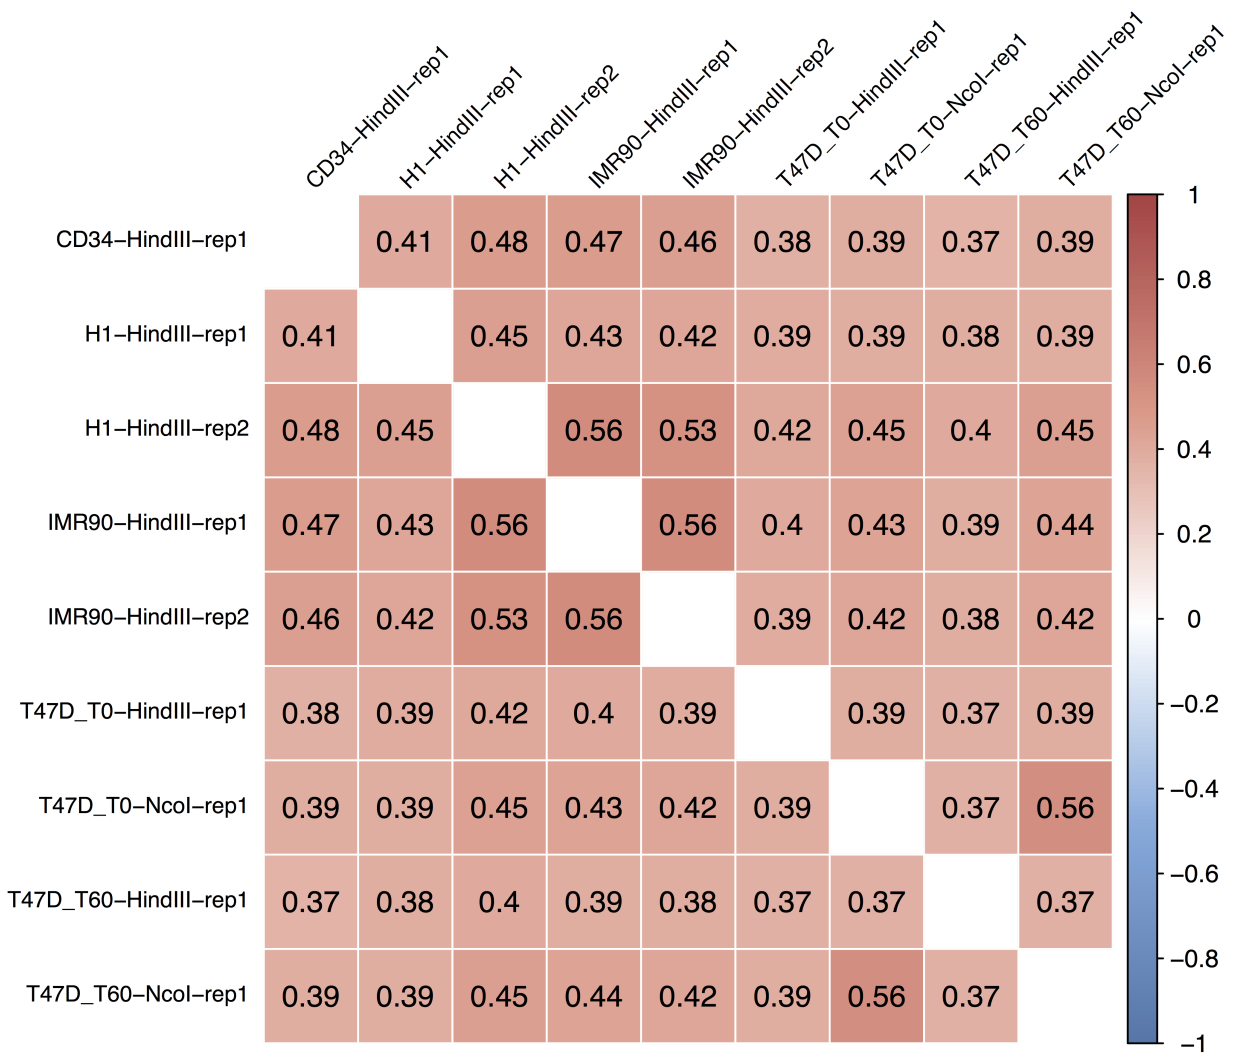

**Figure 7:** Compare Matrices Stats Spearman sample correlograms. See Section 4.12.

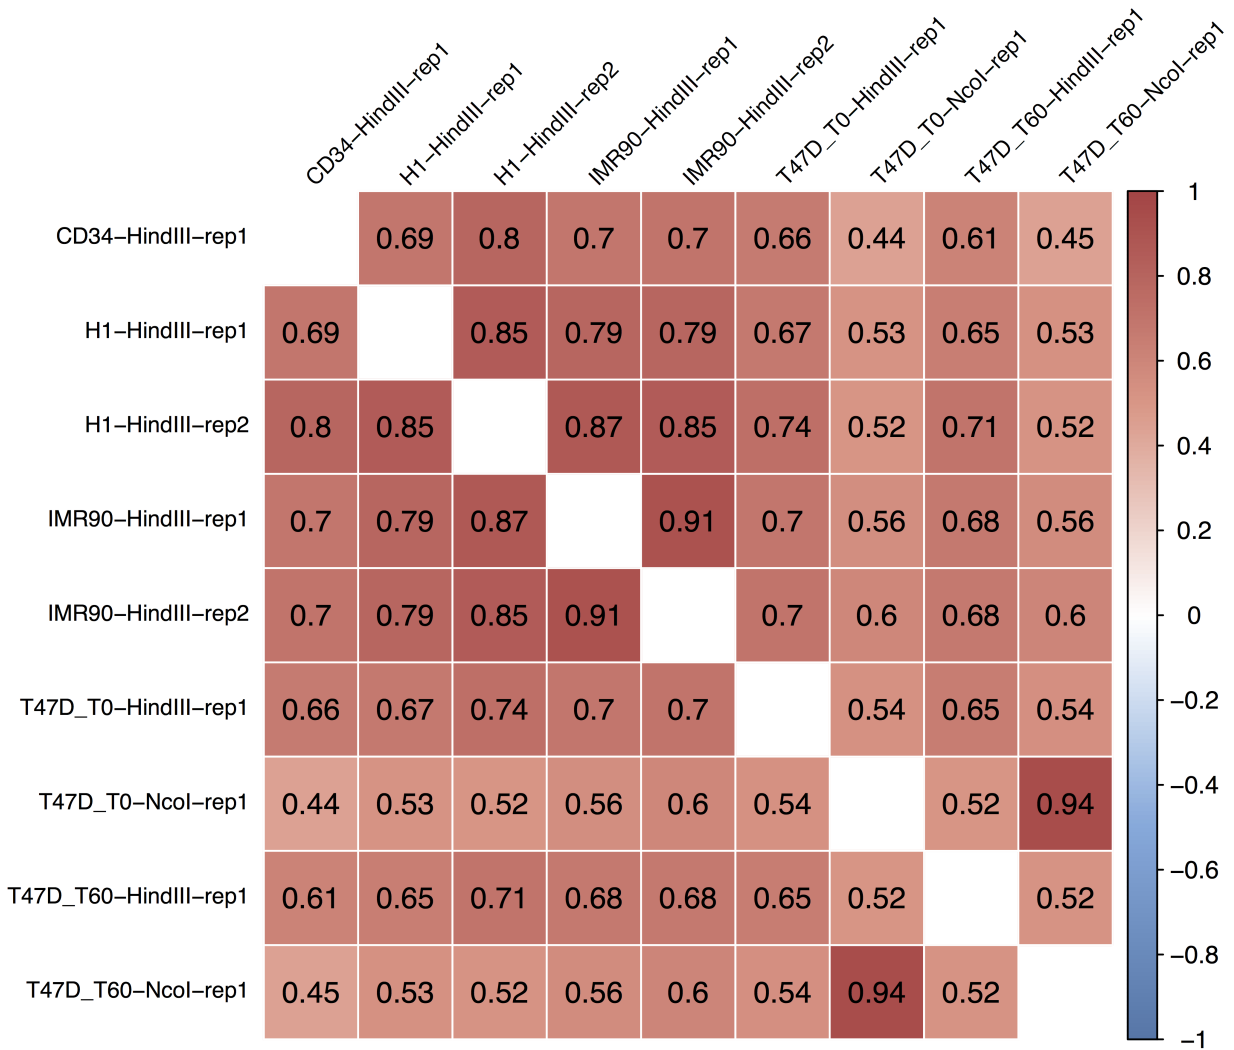

**Figure 8:** Compare Matrices Stats Pearson sample correlograms. See Section 4.12.



## 4.13 Boundary Scores

### 4.13.1 Input

Data from the pipeline steps `matrix-filtered` (Section 4.6), `matrix-hicnorm` (Section 4.9), `matrix-prep` (Section 4.7), and `matrix-ic` (Section 4.8) are used as input.

### 4.13.2 Analysis

Default parameters:

```
1 params.standard.tcsh$
2 #!/bin/tcsh
3
4 source ./inputs/params/params.tcsh
5
6 set chrom_excluded = 'chr[MYX]' # excluded chromosomes
7
8 set boundary_scores_params = ( \
9   --min-lambda=0.0 --max-lambda=1.0 --n-lambda=6 --gamma=0 \
10  --preprocess=none \
11  --distance=`echo 500000/$bin_size | bc` \
12  --distance2=`echo 500000/$bin_size | bc` \
13  --skip-distance=0 \
14  --flank-dist=`echo 500000/$bin_size | bc` \
15  --tolerance=0.01 \
16  --alpha=0.50 \
17  --track-dist=`echo 2000000/$bin_size | bc` \
18  --presentation=none \
19 )
```

### 4.13.3 Output

Default output:

```
1 -rw-r--r-- 1 at570 9.0M Feb 15 14:25 all_scores.k=001.tsv
2 -rw-r--r-- 1 at570 17K Feb 15 14:25 job.err
3 -rw-r--r-- 1 at570 47 Feb 15 14:07 job.id
4 -rw-r--r-- 1 at570 0 Feb 15 14:11 job.out
5 -rw-r--r-- 1 at570 345 Feb 15 14:07 job.sh
6 -rw-r--r-- 1 at570 3.2K Feb 15 14:25 job.vars.tsv
```

## 4.14 Boundary Scores PCA

### 4.14.1 Input

Data from the pipeline boundary-scores step is used as input (Section 4.13).

### 4.14.2 Analysis

Default parameters:

```
params.standard.tcsh
2 #!/bin/tcsh
4 source ./inputs/params/params.tcsh
6 set chrom_excluded = 'chr[MYX]'           # excluded chromosomes
8 set group_var = 'cell_type'               # grouping variable (from sample sheet) to be used for color
   assignment)
```

### 4.14.3 Output

See Figure 9. Default output:

```

1 -rw-r--r-- 1 at570 4.1K Feb 15 15:20 job.err
2 -rw-r--r-- 1 at570 47 Feb 15 15:18 job.id
3 -rw-r--r-- 1 at570 936 Feb 15 15:20 job.out
4 -rw-r--r-- 1 at570 564 Feb 15 15:18 job.sh
5 -rw-r--r-- 1 at570 4.8K Feb 15 15:20 job.vars.tsv
6 -rw-r--r-- 1 at570 211 Feb 15 15:18 labels.tsv
7 -rw-r--r-- 1 at570 4.4K Feb 15 15:19 pca.D1.k=001.pdf
8 -rw-r--r-- 1 at570 4.4K Feb 15 15:19 pca.D12.k=001.pdf
9 -rw-r--r-- 1 at570 4.4K Feb 15 15:19 pca.diff.k=001.pdf
10 -rw-r--r-- 1 at570 4.4K Feb 15 15:20 pca.diffratio.k=001.pdf
11 -rw-r--r-- 1 at570 4.4K Feb 15 15:19 pca.inter.k=001.pdf
12 -rw-r--r-- 1 at570 4.4K Feb 15 15:18 pca.intra-left.k=001.pdf
13 -rw-r--r-- 1 at570 4.4K Feb 15 15:19 pca.intra-max.k=001.pdf
14 -rw-r--r-- 1 at570 4.4K Feb 15 15:19 pca.intra-min.k=001.pdf
15 -rw-r--r-- 1 at570 4.4K Feb 15 15:18 pca.intra-right.k=001.pdf
16 -rw-r--r-- 1 at570 4.4K Feb 15 15:20 pca.novel-max.k=001.pdf
17 -rw-r--r-- 1 at570 4.4K Feb 15 15:20 pca.novel-min.k=001.pdf
18 -rw-r--r-- 1 at570 4.4K Feb 15 15:19 pca.ratio.k=001.pdf
```

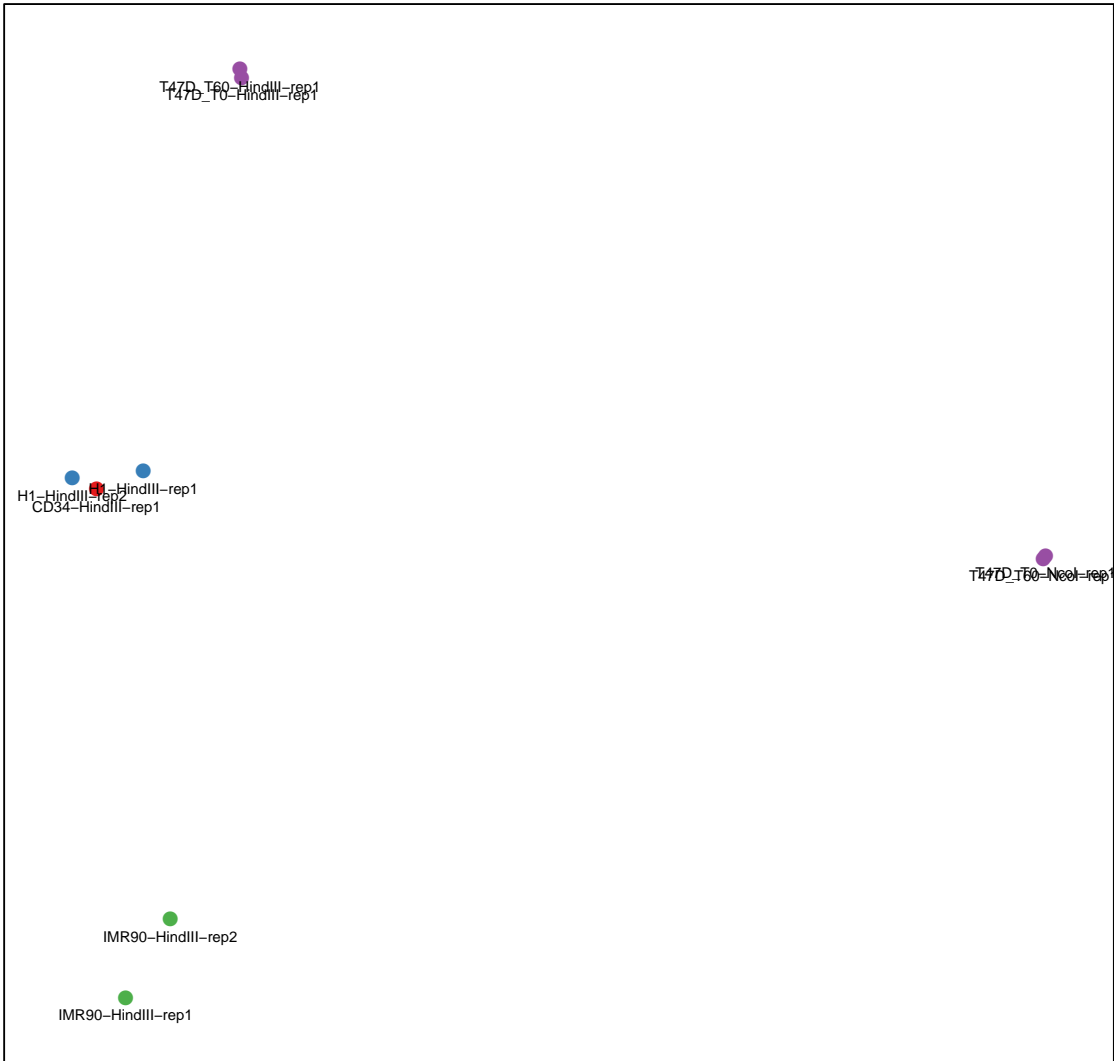

**Figure 9:** Boundary Scores PCA sample output. See Section 4.14.

## 4.15 Domains

### 4.15.1 Input

Data from the pipeline steps `matrix-filtered` (Section 4.6), `matrix-hicnorm` (Section 4.9), `matrix-prep` (Section 4.7), and `matrix-ic` (Section 4.8) are used as input.

### 4.15.2 Analysis

Default parameters:

```
params.armatus.gamma_0.5.tcsh$
2 #!/bin/tcsh
4 source ./inputs/params/params.tcsh
6 set tool = armatus
7 set chrom_excluded = 'chr[MY]'
8 set armatus_params = "-g 0.5"
```

```
params.hicmatrix.tcsh$
2 #!/bin/tcsh
4 source ./inputs/params/params.tcsh
6 set tool = hicmatrix
8 set chrom_excluded = 'chr[MY]'
10 set hicmatrix_params = ( \
11   --min-lambda=0.0 --max-lambda=1.0 --n-lambda=6 --gamma=0 \
12   --preprocess=none \
13   --method=ratio \
14   --distance=`echo 500000/$bin_size | bc` \
15   --distance2=`echo 500000/$bin_size | bc` \
16   --skip-distance=0 \
17   --flank-dist=`echo 500000/$bin_size | bc` \
18   --tolerance=0.01 \
19   --alpha=0.25 \
20   --track-dist=`echo 2000000/$bin_size | bc` \
21   --presentation=none \
22 )
```

```
params.topdom.tcsh$
2 #!/usr/bin/tcsh
4 source ./inputs/params/params.tcsh
6 set tool = topdom
7 set topdompath = "./code/TopDom.R"
8 set chrom_excluded = 'chr[MY]'
9 set winsize = 5
```

### 4.15.3 Output

Default output:

```
1 -rw-r--r-- 1 at570 288K Feb 15 16:31 domains.k=001.bed
2 -rw-r--r-- 1 at570 28K Feb 15 16:31 job.err
3 -rw-r--r-- 1 at570 47 Feb 15 16:13 job.id
4 -rw-r--r-- 1 at570 5.6K Feb 15 16:31 job.out
5 -rw-r--r-- 1 at570 347 Feb 15 16:13 job.sh
6 -rw-r--r-- 1 at570 2.7K Feb 15 16:31 job.vars.tsv
```

## 4.16 Compare Boundaries

### 4.16.1 Input

Data from the pipeline `domains` step is used as input (Section 4.15).

### 4.16.2 Analysis

Default parameters:

```
1 params.standard.tcsh$
2 #!/bin/tcsh
4 source ./inputs/params/params.tcsh
6 set flank_dist = $bin_size
  set black_lists = ($genome_dir/centrotelo.bed)
```

### 4.16.3 Output

Default output:

```
1 -rw-r--r-- 1 at570 573K Feb 16 00:18 boundaries1.k=001.bed
  -rw-r--r-- 1 at570 573K Feb 16 00:18 boundaries2.k=001.bed
3 -rw-r--r-- 1 at570 268K Feb 16 00:18 common_boundaries.k=001.bed
  -rw-r--r-- 1 at570 154 Feb 16 00:18 comparison.tsv
5 -rw-r--r-- 1 at570 268K Feb 16 00:18 intersection.k=001.bed
  -rw-r--r-- 1 at570 70 Feb 16 00:18 job.err
7 -rw-r--r-- 1 at570 47 Feb 16 00:18 job.id
  -rw-r--r-- 1 at570 0 Feb 16 00:18 job.out
9 -rw-r--r-- 1 at570 456 Feb 16 00:18 job.sh
  -rw-r--r-- 1 at570 4.5K Feb 16 00:18 job.vars.tsv
11 -rw-r--r-- 1 at570 268K Feb 16 00:18 union.k=001.bed
```

## 4.17 Compare Boundaries Stats

### 4.17.1 Input

Data from the pipeline `compare-boundaries` step is used as input (Section 4.16).

### 4.17.2 Analysis

Default parameters:

```
1 params.standard.tcsh$  
2 #!/bin/tcsh  
3 source ./inputs/params/params.tcsh
```

### 4.17.3 Output

See Figure 11 and Figure 10. Default output:

```
1 -rw-r--r-- 1 at570 6.9K Feb 12 12:52 comparisons.tsv  
2 -rw-r--r-- 1 at570 27K Feb 12 12:52 correlograms.pdf  
3 -rw-r--r-- 1 at570 238 Feb 12 12:52 job.err  
4 -rw-r--r-- 1 at570 47 Feb 12 12:51 job.id  
5 -rw-r--r-- 1 at570 52 Feb 12 12:52 job.out  
6 -rw-r--r-- 1 at570 3.5K Feb 12 12:51 job.sh  
7 -rw-r--r-- 1 at570 51K Feb 12 12:52 job.vars.tsv  
8 -rw-r--r-- 1 at570 5.6K Feb 12 12:52 raw_comparisons.pdf
```

### Number of boundaries

|                       | CD34–HindIII–rep1 | H1–HindIII–rep1 | H1–HindIII–rep2 | IMR90–HindIII–rep1 | IMR90–HindIII–rep2 | T47D_T0–HindIII–rep1 | T47D_T0–Ncol–rep1 | T47D_T60–HindIII–rep1 | T47D_T60–Ncol–rep1 |
|-----------------------|-------------------|-----------------|-----------------|--------------------|--------------------|----------------------|-------------------|-----------------------|--------------------|
| CD34–HindIII–rep1     | <b>9158</b>       | <b>5231</b>     | <b>5277</b>     | <b>4045</b>        | <b>4157</b>        | <b>5006</b>          | <b>3532</b>       | <b>4869</b>           | <b>3546</b>        |
| H1–HindIII–rep1       | <b>5231</b>       | <b>7258</b>     | <b>4724</b>     | <b>3860</b>        | <b>4059</b>        | <b>4481</b>          | <b>3215</b>       | <b>4481</b>           | <b>3232</b>        |
| H1–HindIII–rep2       | <b>5277</b>       | <b>4724</b>     | <b>6564</b>     | <b>3615</b>        | <b>3719</b>        | <b>4186</b>          | <b>2860</b>       | <b>4149</b>           | <b>2890</b>        |
| IMR90–HindIII–rep1    | <b>4045</b>       | <b>3860</b>     | <b>3615</b>     | <b>5464</b>        | <b>4291</b>        | <b>3539</b>          | <b>2666</b>       | <b>3576</b>           | <b>2678</b>        |
| IMR90–HindIII–rep2    | <b>4157</b>       | <b>4059</b>     | <b>3719</b>     | <b>4291</b>        | <b>5800</b>        | <b>3767</b>          | <b>2813</b>       | <b>3749</b>           | <b>2823</b>        |
| T47D_T0–HindIII–rep1  | <b>5006</b>       | <b>4481</b>     | <b>4186</b>     | <b>3539</b>        | <b>3767</b>        | <b>7364</b>          | <b>3252</b>       | <b>5027</b>           | <b>3264</b>        |
| T47D_T0–Ncol–rep1     | <b>3532</b>       | <b>3215</b>     | <b>2860</b>     | <b>2666</b>        | <b>2813</b>        | <b>3252</b>          | <b>5417</b>       | <b>3205</b>           | <b>4467</b>        |
| T47D_T60–HindIII–rep1 | <b>4869</b>       | <b>4481</b>     | <b>4149</b>     | <b>3576</b>        | <b>3749</b>        | <b>5027</b>          | <b>3205</b>       | <b>7215</b>           | <b>3234</b>        |
| T47D_T60–Ncol–rep1    | <b>3546</b>       | <b>3232</b>     | <b>2890</b>     | <b>2678</b>        | <b>2823</b>        | <b>3264</b>          | <b>4467</b>       | <b>3234</b>           | <b>5401</b>        |

**Figure 10:** Example raw comparisons. See Section 4.17.

### Overlap (%)

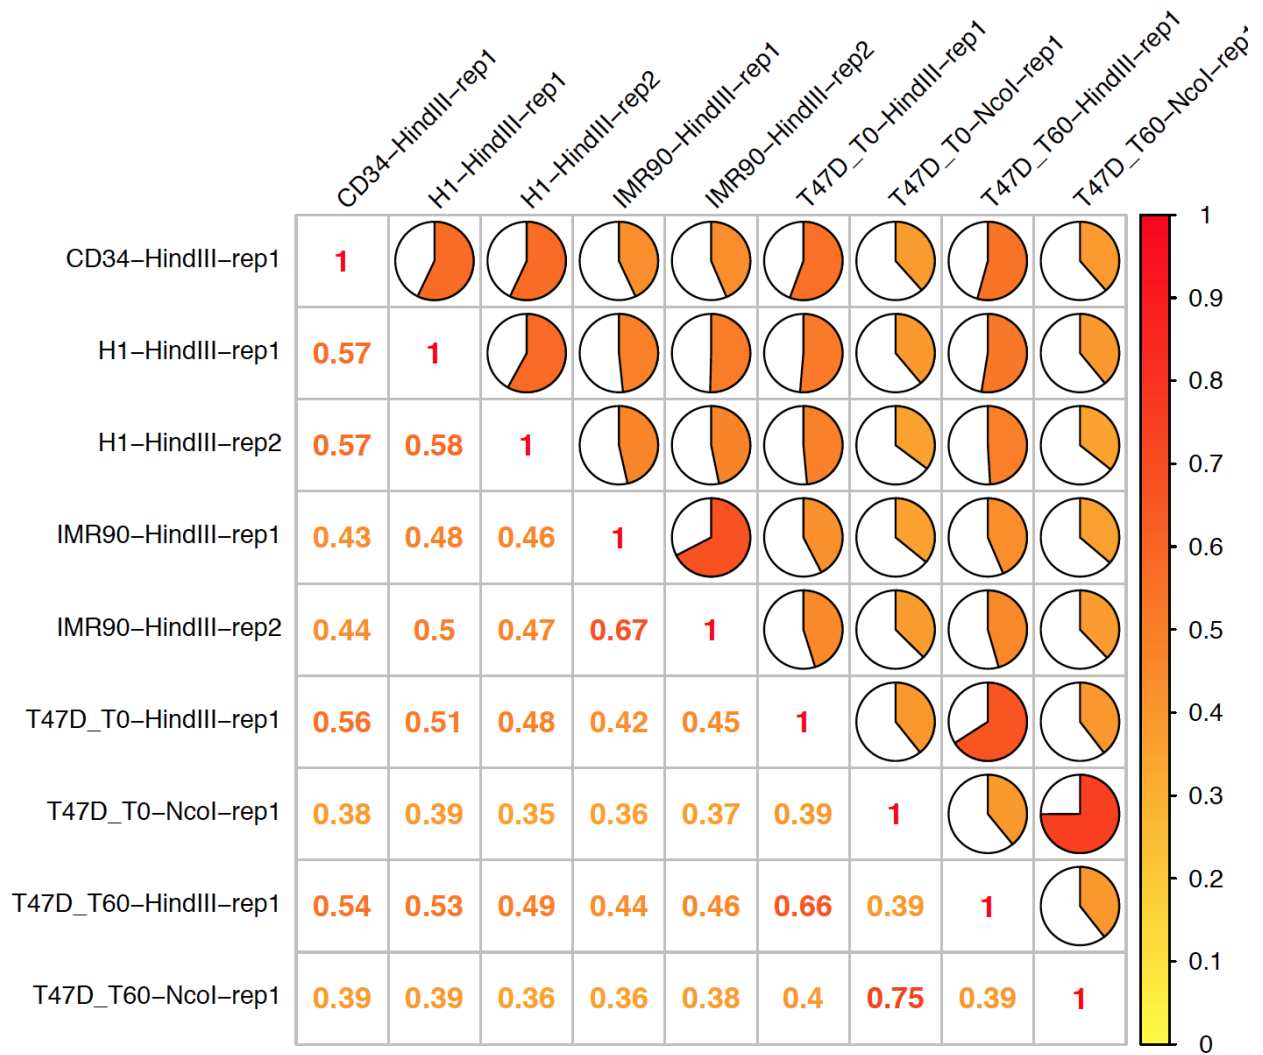

Figure 11: Example correlograms. See Section 4.17.



## 4.18 HiC Plotter

### 4.18.1 Input

Data from the pipeline steps `matrix-filtered` (Section 4.6), `matrix-hicnorm` (Section 4.9), `matrix-prep` (Section 4.7), and `matrix-ic` (Section 4.8) are used as input.

### 4.18.2 Analysis

Default parameters:

```
params.standard.tcsh$
2 #!/bin/tcsh
4 source ./inputs/params/params.tcsh
6 # HiCplotter path
7 set hicplotter_path = ./code/HiCPlotter2.py
8
9 # create bedgraphs for boundary scores
10 set bscores_branch = ../boundary-scores/results/boundary-scores.by_sample.standard/`echo $branch | sed 's/.*
    results\\/'`
11 set cell_type = `echo $objects[1] | cut -d'-' -f1`
12 set f = $bscores_branch/$objects[1]/all_scores.k=001.tsv
13 set methods = (intra-max DI ratio)
14 set bedgraphs = ()
15 set bedgraph_labels = ($methods)
16 foreach m ($methods)
17     set k = `head -1 $f | tr '\t' '\n' | grep -n "^$m" '$' | cut -d':' -f1`
18     cat $f | sed '1d' | cut -f1,$k | sed 's:/\t/' | sed 's/-\t/' >! $outdir/bscores.$m.bedGraph
19     set bedgraphs = ($bedgraphs $outdir/bscores.$m.bedGraph)
20 end
21
22 # add CTCF ChIP-seq
23 if (-e inputs/data.external/$cell_type/CTCF.bedGraph) then
24     set bedgraphs = ($bedgraphs inputs/data.external/$cell_type/CTCF.bedGraph)
25     set bedgraph_labels = ($bedgraph_labels CTCF)
26 endif
27
28 # regions to plot
29 set regions = "chr8:125000000-133000000"
30 set tiles = "params/regions.bed"
31 set tiles_labels = "regions"
32 set highlight = 1
33 set highlight_bed = "params/highlight.bed"
34 set fileheader = 0 # Either 1 or 0 (header / no header)
35 set insulation_score = 0 # Either 1 or 0 (include insulation index or not)
```

### 4.18.3 Output

See Figure 12. Default output:

```
1 -rw-r--r-- 1 at570 2.3M Feb 15 14:49 bscores.DI.bedGraph
2 -rw-r--r-- 1 at570 2.3M Feb 15 14:49 bscores.intra-max.bedGraph
3 -rw-r--r-- 1 at570 2.3M Feb 15 14:49 bscores.ratio.bedGraph
4 -rw-r--r-- 1 at570 146K Feb 15 14:50 chr8:125000000-133000000.pdf
5 -rw-r--r-- 1 at570 107 Feb 15 14:50 job.err
6 -rw-r--r-- 1 at570 47 Feb 15 14:49 job.id
7 -rw-r--r-- 1 at570 40 Feb 15 14:50 job.out
8 -rw-r--r-- 1 at570 335 Feb 15 14:49 job.sh
9 -rw-r--r-- 1 at570 8.4K Feb 15 14:50 job.vars.tsv
```

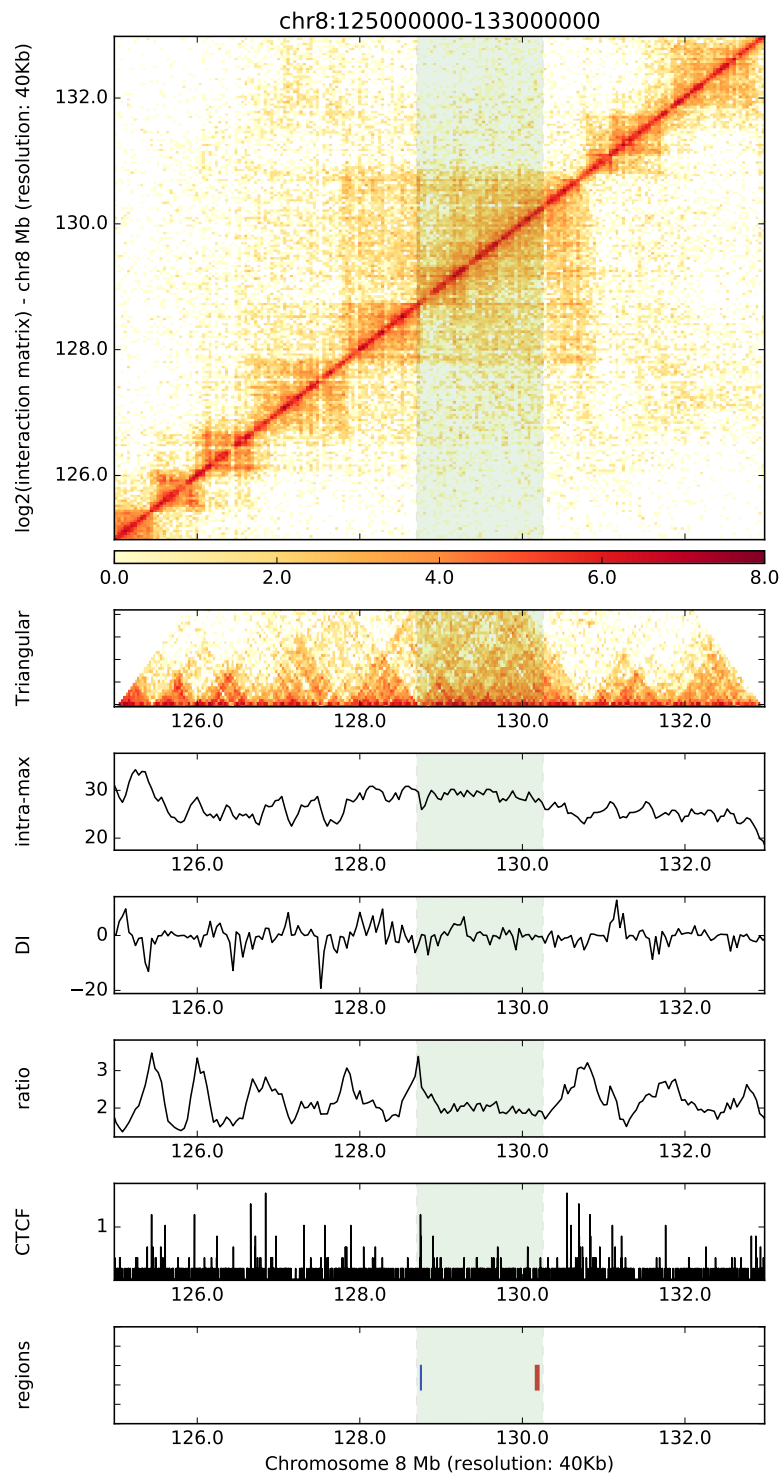

**Figure 12:** HiCPlotter sample output  
Page 50 of 62

## 4.19 Interactions

### 4.19.1 Input

Data from the pipeline `matrix-filtered` step is used as input (Section 4.6).

### 4.19.2 Analysis

Default parameters:

```
1 #!/bin/tcsh
3 source ./inputs/params/params.tcsh
5 set chrom_excluded = 'chr[MYX]' # excluded chromosomes
7 set loop_params = "--bin-size=$bin_size --lambda-id=6 --rpk2b-cutoff=1.0 --loop-cutoff=4.0 --min-distance=40000"
# parameters for identifying significant interactions
```

### 4.19.3 Output

See Figure 13. Default output:

```
1 drwxr-xr-x 2 at570 3.3K Feb 5 10:12 __jdata
  -rw-r--r-- 1 at570 4.8K Feb 5 10:17 job.err
3  -rw-r--r-- 1 at570 47 Feb 5 10:11 job.id
  -rw-r--r-- 1 at570 0 Feb 5 10:11 job.out
5  -rw-r--r-- 1 at570 375 Feb 5 10:11 job.sh
  -rw-r--r-- 1 at570 3.6K Feb 5 10:17 job.vars.tsv
7  drwxr-xr-x 2 at570 54 Feb 5 10:15 matrix.chr1
  drwxr-xr-x 2 at570 54 Feb 5 10:14 matrix.chr10
9  drwxr-xr-x 2 at570 54 Feb 5 10:14 matrix.chr11
  drwxr-xr-x 2 at570 54 Feb 5 10:14 matrix.chr12
11 drwxr-xr-x 2 at570 54 Feb 5 10:13 matrix.chr13
  drwxr-xr-x 2 at570 54 Feb 5 10:13 matrix.chr14
13 drwxr-xr-x 2 at570 54 Feb 5 10:13 matrix.chr15
  drwxr-xr-x 2 at570 54 Feb 5 10:13 matrix.chr16
15 drwxr-xr-x 2 at570 54 Feb 5 10:13 matrix.chr17
  drwxr-xr-x 2 at570 54 Feb 5 10:13 matrix.chr18
17 drwxr-xr-x 2 at570 54 Feb 5 10:13 matrix.chr19
  drwxr-xr-x 2 at570 54 Feb 5 10:16 matrix.chr2
19 drwxr-xr-x 2 at570 54 Feb 5 10:13 matrix.chr20
  drwxr-xr-x 2 at570 54 Feb 5 10:12 matrix.chr21
21 drwxr-xr-x 2 at570 54 Feb 5 10:13 matrix.chr22
  drwxr-xr-x 2 at570 54 Feb 5 10:15 matrix.chr3
23 drwxr-xr-x 2 at570 54 Feb 5 10:15 matrix.chr4
  drwxr-xr-x 2 at570 54 Feb 5 10:15 matrix.chr5
25 drwxr-xr-x 2 at570 54 Feb 5 10:15 matrix.chr6
  drwxr-xr-x 2 at570 54 Feb 5 10:14 matrix.chr7
27 drwxr-xr-x 2 at570 54 Feb 5 10:14 matrix.chr8
  drwxr-xr-x 2 at570 54 Feb 5 10:14 matrix.chr9
```

```
matrix.chr1$
2  -rw-r--r-- 1 at570 4.7M Feb 5 10:15 loops.tsv
  -rw-r--r-- 1 at570 27K Feb 5 10:16 plots.pdf
```

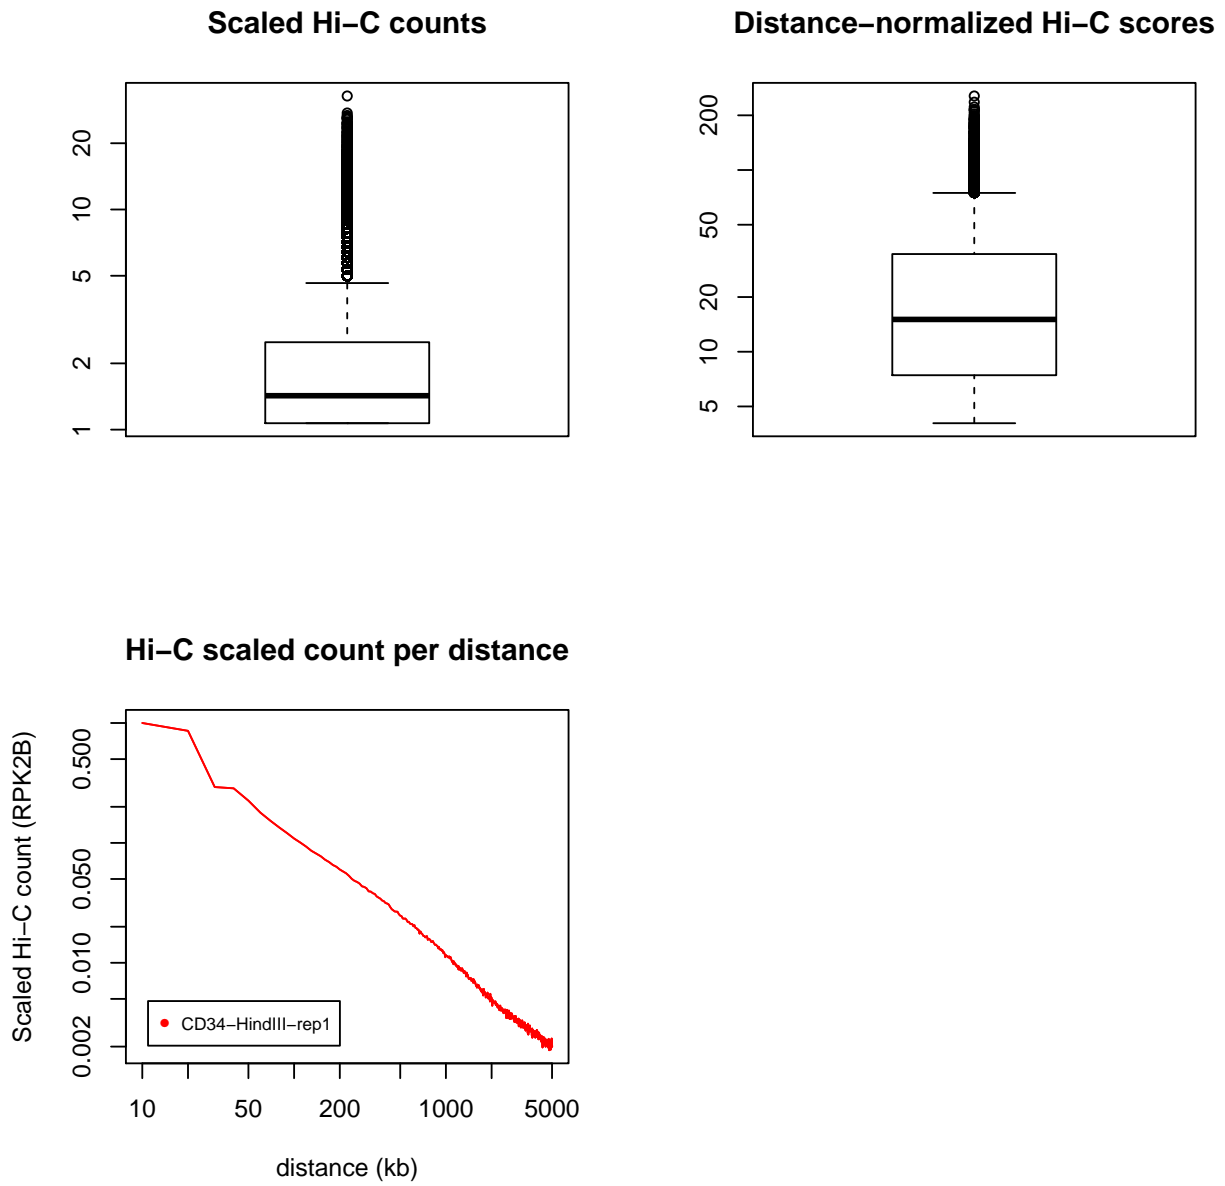

**Figure 13:** Interactions sample output

## 4.20 Annotations

### 4.20.1 Input

Data from the pipeline interactions step is used as input (Section 4.19).

### 4.20.2 Analysis

Default parameters:

```
1 params.standard.tcsh$
2 #!/bin/tcsh
3
4 source ./inputs/params/params.tcsh
5
6 set genes_bed = $genome_dir/gene.bed # gene BED6 file for annotation of interactions
7 set cell_type = `echo $objects[1] | cut -d'-' -f1`
8 if (! -e inputs/data.external/$cell_type) then
9     set loci_bed = ()
10 else
11     set loci_bed = `find inputs/data.external/$cell_type -maxdepth 1 -name '*.bed'`
12 endif
```

### 4.20.3 Output

Default output:

```
1 -rw-r--r-- 1 at570 5.9M Feb 5 17:33 bin.annotated.tsv
2 -rw-r--r-- 1 at570 3.8M Feb 5 17:33 bin.gene.tsv
3 -rw-r--r-- 1 at570 7.5M Feb 5 17:33 bin.loci.tsv
4 -rw-r--r-- 1 at570 8.7M Feb 5 17:33 bin.reg
5 -rw-r--r-- 1 at570 5.4K Feb 5 17:33 job.err
6 -rw-r--r-- 1 at570 47 Feb 5 17:32 job.id
7 -rw-r--r-- 1 at570 0 Feb 5 17:33 job.out
8 -rw-r--r-- 1 at570 434 Feb 5 17:32 job.sh
9 -rw-r--r-- 1 at570 3.1K Feb 5 17:33 job.vars.tsv
10 -rw-r--r-- 1 at570 42M Feb 5 17:33 loci.reg
11 -rw-r--r-- 1 at570 45M Feb 5 17:33 table.annotated.tsv
```

## 4.21 Annotations Stats

### 4.21.1 Input

Data from the pipeline `annotations` step is used as input (Section 4.20).

### 4.21.2 Analysis

Default parameters:

```
1 params.standard.tcsh$  
2 #!/bin/tcsh  
3  
4 source ./inputs/params/params.tcsh  
5  
6 set nbest = 10000           # choose top-scoring interactions to calculate enrichments
```

### 4.21.3 Output

See Figure 14. Default output:

```
2 -rw-r--r-- 1 at570 77 Feb 16 17:26 counts.tsv  
3 -rw-r--r-- 1 at570 350 Feb 16 17:26 enrich.tsv  
4 -rw-r--r-- 1 at570 7.0K Feb 16 17:26 enrichment.pdf  
5 -rw-r--r-- 1 at570 121 Feb 16 17:26 job.err  
6 -rw-r--r-- 1 at570 47 Feb 16 17:25 job.id  
7 -rw-r--r-- 1 at570 62 Feb 16 17:26 job.out  
8 -rw-r--r-- 1 at570 507 Feb 16 17:25 job.sh  
9 -rw-r--r-- 1 at570 3.1K Feb 16 17:26 job.vars.tsv  
10 -rw-r--r-- 1 at570 184 Feb 16 17:25 top_counts.tsv
```

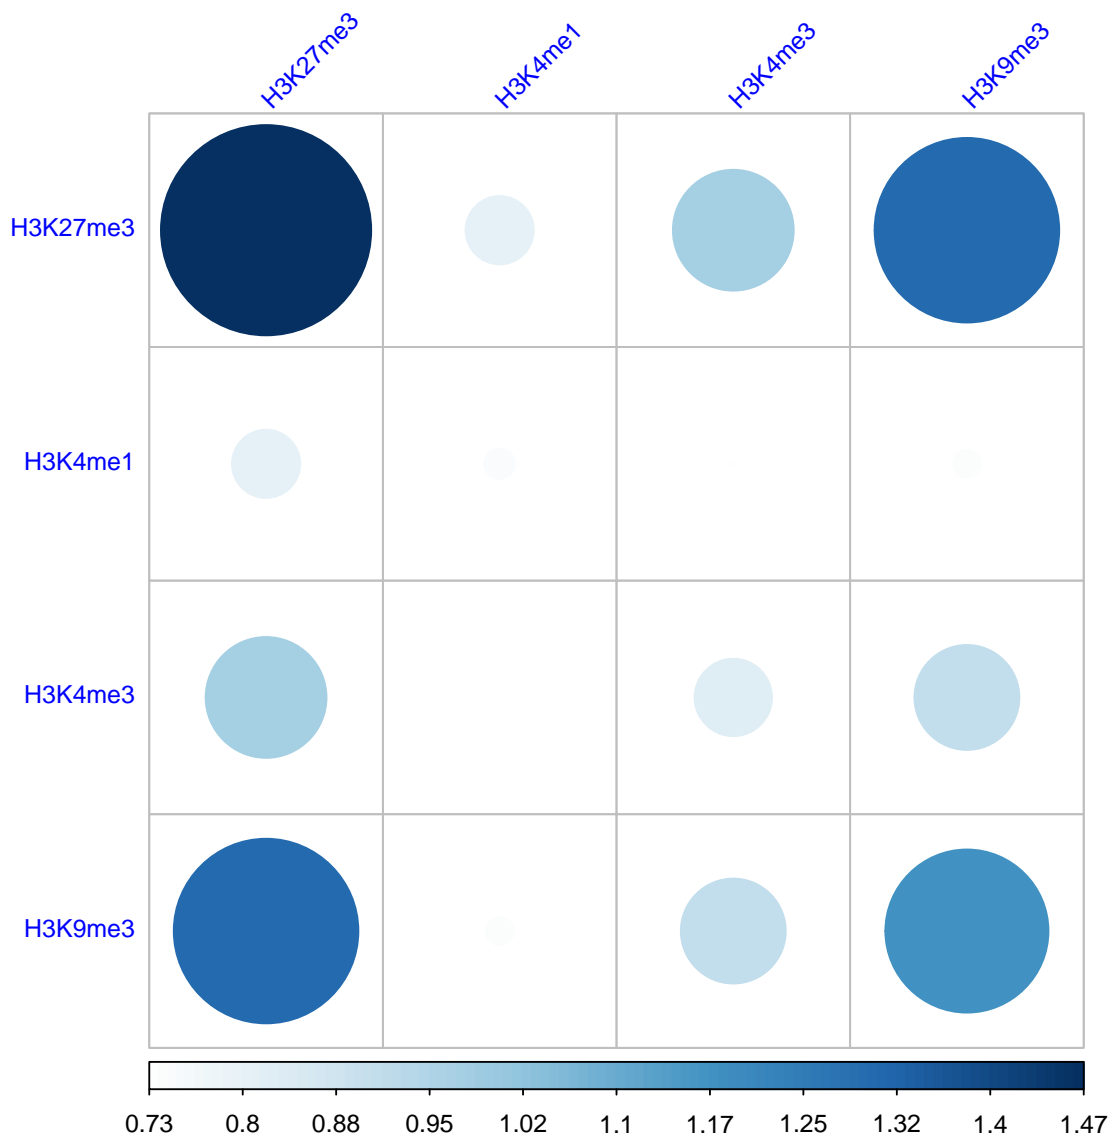

**Figure 14:** Annotation Stats enrichment sample output. See Section 4.21.

## 5 Appendix

### 5.1 Error Logs

Errors encountered during pipeline execution can be viewed with:

```
1 <project_directory> $ code.main/pipeline-errors
```

Analysis results can be removed with:

```
1 <project_directory> $ code/clean-all
```

### 5.2 Other Pipeline Software: gtools-hic

```
1 code.repo/bin/gtools-hic$
3 USAGE:
   gtools-hic OPERATION [OPTIONS] <REGION-SET>
5
7 VERSION:
   genomic-tools 3.0.0
9 DESCRIPTION:
   Pipeline for HiC-seq data analysis. For detailed description and list of options choose an operation and use
   the --help option.
11
13 OPERATION:
   align          Iteratively aligns HiC-seq read pairs to reference genome using bowtie2.
   classify       Classifies and computes various metrics for HiC-seq aligned read pairs.
   filter        Filters HiC-seq aligned read pairs for common experimental artifacts.
   bin           Bins filtered read pairs to genomic bins of desired resolution.
   matrix        Create Hi-C count matrix.
   convert       Convert contact matrix into WashU Epigenome Browser format.
```

#### 5.2.1 gtools-hic align

```
code.repo/bin/gtools-hic align --help
2
4 USAGE:
   gtools-hic align [OPTIONS] READ1-FASTQ READ2-FASTQ
6 DESCRIPTION:
   Iteratively aligns HiC-seq read pairs to reference genome using bowtie2.
8
10 DETAILS:
   * Input: FASTQ files
   * Output: aligned reads in SAM format (same order as in fastq files)
12
14 OPTIONS:
   --help          help [true]
   -h             help [true]
   -v            verbose mode [false]
   --work-dir     working directory (required) []
   --min-len     minimum truncated read length [30]
   --len-diff    read truncation step [10]
   -p            number of threads for bowtie2 run [1]
   --bowtie-path full bowtie2 path (version >=2.1.0) [bowtie2]
   --bowtie-index full bowtie2 index prefix path [genome/bowtie2.index
   /genome]
```



## 5.2.2 gtools-hic classify

```
code.repo/bin/gtools-hic classify --help$
2
3 USAGE:
4   gtools-hic classify [OPTIONS] <ALIGNED-READS>
5
6 DESCRIPTION:
7   Classifies and computes various metrics for HiC-seq aligned read pairs.
8
9 DETAILS:
10  * Input: aligned reads in SAM format (sorted by read-id, at most one alignment per read)
11  * Output: tab-separated table
12
13 OPTIONS:
14  --help                help [true]
15  -h                    help [true]
16  -v                    verbose mode [false]
17  -E                    enzyme fragments (BED/GFF/SAM/REG) []
18  --mapq                minimum mapping quality (MAPQ) [3.000000e+01]
19  --min-dist            minimum allowed distance between 5's of reads in read pair [500]
20  --max-offset          maximum allowed offset of 5's of reads from fragment ends [500]
```

## 5.2.3 gtools-hic filter

```
code.repo/bin/gtools-hic filter --help$
3
4 USAGE:
5   gtools-hic filter [OPTIONS] <ALIGNED-READS>
6
7 DESCRIPTION:
8   Filters HiC-seq aligned read pairs for common experimental artifacts.
9
10 DETAILS:
11  * Input: aligned reads in SAM format (sorted by read-id, at most one alignment per read)
12  * Output: filtered read pairs in REG format
13
14 OPTIONS:
15  --help                help [true]
16  -h                    help [true]
17  -v                    verbose mode [false]
18  -E                    enzyme fragments (BED/GFF/SAM/REG) []
19  --mapq                minimum mapping quality (MAPQ) [3.000000e+01]
20  --min-dist            minimum allowed distance between 5's of reads in read pair [500]
21  --max-offset          maximum allowed offset of 5's of reads from fragment ends [500]
22  --filter-dups         filter duplicate read pairs as PCR artifacts [false]
23  --stats               output statistics file (default=stderr) []
```

## 5.2.4 gtools-hic bin

```
code.repo/bin/gtools-hic bin --help$
2
3 USAGE:
4   gtools-hic bin [OPTIONS] <FILTERED-READ-PAIRS>
5
6 DESCRIPTION:
7   Bins filtered read pairs to genomic bins of desired resolution.
8
9 DETAILS:
10  * Input: filtered read pairs in REG format
11  * Output: binned read pairs
12
13 OPTIONS:
14  --help                help [true]
15  -h                    help [true]
16  -v                    verbose mode [false]
17  --bin-size            genomic bin size [1000000]
18  -g                    genome region file (BED/REG) []
```

|    |                             |                                                                 |         |
|----|-----------------------------|-----------------------------------------------------------------|---------|
| 20 | <code>--split-matrix</code> | print output as matrix                                          | [false] |
|    | <code>--matrix</code>       | print output as matrix (overrides <code>--split-matrix</code> ) | [false] |

## 5.2.5 gtools-hic matrix

```
code.repo/bin/gtools-hic matrix --help$
2
USAGE:
4 gtools-hic matrix [OPTIONS] <FILTERED-READ-PAIRS>
6
DESCRIPTION:
8 Create Hi-C count matrix.
10
DETAILS:
12 * Input: filtered read pairs in REG format
14 * Output: contact matrix
16
OPTIONS:
18 --help help [true]
20 --h help [true]
--v verbose mode [false]
--bin-size genomic bin size (in nucleotides) [5000]
--max-dist maximum distance between bins (in nucleotides; default = no restriction)[0]
--rotate45 rotate matrix by 45 degrees (applicable if --max-dist > 0) [false]
-R reference region file (BED/REG) []
-p output file prefix []
```

## 5.2.6 gtools-hic convert

```
1 code.repo/bin/gtools-hic convert --help
3
USAGE:
5 gtools-hic convert [OPTIONS] <CONTACT-MATRIX>
7
DESCRIPTION:
9 Convert contact matrix into WashU Epigenome Browser format.
11
DETAILS:
13 * Input: locus-labelled contact matrix
15 * Output: WashU Epigenome Browser format
17
OPTIONS:
19 --help help [true]
21 --h help [true]
--v verbose mode [false]
--col-labels input matrix has column labels [false]
-t matrix element separator [ ]
-c normalization constant [1.000000e+00]
--min score cutoff (values below this are set to zero) [0.000000e+00]
-d maximum distance between interacting loci (default = no limit) [0]
```

### 5.3 Other Pipeline Software: pipeline-master-explorer.r

The `pipeline-master-explorer.r` script, located in the `code.main` directory, is the driver of combinatorial parameter exploration during the execution of each pipeline step.

```
1 code.main$ ./pipeline-master-explorer.r --help
Usage: pipeline-master-explorer.r [OPTIONS] SCRIPT OUTDIR-PREFIX PARAM-SCRIPTS INPUT-BRANCHES SPLIT-VARIABLE
   OUTPUT-OBJECT-VARIABLE TUPLES
3
5 Options:
   -v, --verbose
7     Print more messages.
9   -S SAMPLE-SHEET, --sample-sheet=SAMPLE-SHEET
     Sample sheet file name (required) [default "inputs/sample-sheet.tsv"].
11  -F FILTER-BRANCH, --filter-branch=FILTER-BRANCH
     Regular expression for filtering input branches [default ""].
13  --exclude-branch=EXCLUDE-BRANCH
     Regular expression for excluding input branches [default ""].
15  --exclude-obj=EXCLUDE-OBJ
     Regular expression for excluding input objects [default ""].
17  --exclude-outdir=EXCLUDE-OUTDIR
     Regular expression for excluding output directories [default ""].
21  -h, --help
25     Show this help message and exit
```

## 5.4 System and Session Information

L<sup>A</sup>T<sub>E</sub>X version: L<sup>A</sup>T<sub>E</sub>X 2<sub>ε</sub> 2005/12/01

```
system('uname -srv',intern=T)

## [1] "Linux 2.6.32-573.18.1.el6.x86_64 #1 SMP Tue Feb 9 22:46:17 UTC 2016"

sessionInfo()

## R version 3.2.3 (2015-12-10)
## Platform: x86_64-redhat-linux-gnu (64-bit)
## Running under: CentOS release 6.7 (Final)
##
## locale:
## [1] LC_CTYPE=en_US.UTF-8      LC_NUMERIC=C                LC_TIME=en_US.UTF-8
## [4] LC_COLLATE=en_US.UTF-8    LC_MONETARY=en_US.UTF-8    LC_MESSAGES=en_US.UTF-8
## [7] LC_PAPER=en_US.UTF-8      LC_NAME=C                   LC_ADDRESS=C
## [10] LC_TELEPHONE=C           LC_MEASUREMENT=en_US.UTF-8 LC_IDENTIFICATION=C
##
## attached base packages:
## [1] stats      graphics  grDevices  utils      datasets  methods   base
##
## other attached packages:
## [1] knitr_1.12.3
##
## loaded via a namespace (and not attached):
## [1] magrittr_1.5  formatR_1.2.1 tools_3.2.3  stringi_1.0-1 highr_0.5.1  stringr_1.0.0
## [7] evaluate_0.8
```

### 5.4.1 L<sup>A</sup>T<sub>E</sub>X File List

|    |               |            |              |                                                 |
|----|---------------|------------|--------------|-------------------------------------------------|
| 1  | article.cls   | 2005/09/16 | v1.4f        | Standard LaTeX document class                   |
|    | size10.clo    | 2005/09/16 | v1.4f        | Standard LaTeX file (size option)               |
| 3  | graphicx.sty  | 1999/02/16 | v1.0f        | Enhanced LaTeX Graphics (DPC,SPQR)              |
|    | keyval.sty    | 1999/03/16 | v1.13        | key=value parser (DPC)                          |
| 5  | graphics.sty  | 2006/02/20 | v1.0o        | Standard LaTeX Graphics (DPC,SPQR)              |
|    | trig.sty      | 1999/03/16 | v1.09        | sin cos tan (DPC)                               |
| 7  | graphics.cfg  | 2007/01/18 | v1.5         | graphics configuration of TeX/LaTeX             |
|    | pdftex.def    | 2007/01/08 | v0.04d       | Graphics/color for pdfTeX                       |
| 9  | color.sty     | 1999/02/16 |              |                                                 |
|    | color.cfg     | 2007/01/18 | v1.5         | color configuration of TeX/LaTeX                |
| 11 | framed.sty    | 2011/10/22 | v 0.96:      | framed or shaded text with page breaks          |
|    | alltt.sty     | 1997/06/16 | v2.0g        | defines alltt environment                       |
| 13 | mathpazo.sty  | 2005/04/12 | PSNFSS-v9.2a | Palatino w/ Pazo Math (D.Puga, WaS)             |
|    | helvet.sty    | 2005/04/12 | PSNFSS-v9.2a | (WaS)                                           |
| 15 | fontenc.sty   |            |              |                                                 |
|    | tlenc.def     | 2005/09/27 | v1.99g       | Standard LaTeX file                             |
| 17 | geometry.sty  | 2002/07/08 | v3.2         | Page Geometry                                   |
|    | geometry.cfg  |            |              |                                                 |
| 19 | cite.sty      | 2003/11/04 | v 4.01       |                                                 |
|    | caption.sty   | 2007/01/07 | v3.0k        | Customising captions (AR)                       |
| 21 | caption3.sty  | 2007/01/07 | v3.0k        | caption3 kernel (AR)                            |
|    | hyperref.sty  | 2007/02/07 | v6.75r       | Hyperref: PDFDocEncoding definition (HO)        |
| 23 | pdftenc.def   | 2007/02/07 | v6.75r       | Hyperref: PDFDocEncoding definition (HO)        |
|    | hyperref.cfg  | 2002/06/06 | v1.2         | hyperref configuration of TeX/LaTeX             |
| 25 | kvoptions.sty | 2006/08/22 | v2.4         | Connects package keyval with LaTeX options (HO) |
|    | )             |            |              |                                                 |
| 27 | puenc.def     | 2007/02/07 | v6.75r       | Hyperref: PDF Unicode definition (HO)           |
|    | url.sty       | 2005/06/27 | ver 3.2      | Verb mode for urls, etc.                        |
| 29 | hpdftex.def   | 2007/02/07 | v6.75r       | Hyperref driver for pdfTeX                      |
|    | breakurl.sty  | 2006/08/26 | v1.20        | Breakable hyperref URLs                         |
| 31 | xkeyval.sty   | 2006/11/18 | v2.5f        | package option processing (HA)                  |
|    | xkeyval.tex   | 2006/11/18 | v2.5f        | key=value parser (HA)                           |

```

33 forloop.sty      2006/09/18 v3.0 For Loops for LaTeX
   ifthen.sty     2001/05/26 v1.1c Standard LaTeX ifthen package (DPC)
35 tikz.sty        2006/10/17 v1.10 (rcs-revision 1.68)
   pgf.sty         2006/10/11 v1.10 (rcs-revision 1.7)
37 pgfrcs.sty      2006/10/26 v1.10 (rcs-revision 1.14)
   pgfrcs.code.tex
39 pgfcore.sty     2006/10/11 v1.10 (rcs-revision 1.4)
   pgfsys.sty     2006/10/16 v1.10 (rcs-revision 1.19)
41 pgfsys.code.tex
   pgfsyssoftpath.code.tex  2006/10/16 (rcs-revision 1.4)
43 pgfsysprotocol.code.tex  2006/10/16 (rcs-revision 1.4)
   xcolor.sty     2007/01/21 v2.11 LaTeX color extensions (UK)
45 color.cfg      2007/01/18 v1.5 color configuration of TeX/TeXLive
   pgfcore.code.tex
47 pgfbaseshapes.sty  2006/10/16 v1.10 (rcs-revision 1.16)
   pgfbaseshapes.code.tex
49 pgfbaseplot.sty  2006/10/16 v1.10 (rcs-revision 1.5)
   pgfbaseplot.code.tex
51 pgfbaseimage.sty  2006/10/16 v1.10 (rcs-revision 1.5)
   pgfbaseimage.code.tex
53 pgfbaselayers.sty  2006/10/16 v1.10 (rcs-revision 1.5)
   pgfbaselayers.code.tex
55 pgfbasesnakes.sty  2006/10/16 v1.10 (rcs-revision 1.10)
   pgfbasesnakes.code.tex
57 pgfbasepatterns.sty  2006/10/16 v1.10 (rcs-revision 1.9)
   pgfbasepatterns.code.tex
59 pgfcomp-version-0-65.sty  2006/10/11 v1.10 (rcs-revision 1.4)
   calc.sty       2005/08/06 v4.2 Infix arithmetic (KKT,FJ)
61 pgffor.sty      2006/10/16 v1.10 (rcs-revision 1.5)
   pgffor.code.tex
63 tikz.code.tex
   amsmath.sty    2000/07/18 v2.13 AMS math features
65 amstext.sty     2000/06/29 v2.01
   amsgen.sty     1999/11/30 v2.0
67 amsbsy.sty      1999/11/29 v1.2d
   amsopn.sty     1999/12/14 v2.01 operator names
69 colortbl.sty    2001/02/13 v0.1j Color table columns (DPC)
   array.sty      2005/08/23 v2.4b Tabular extension package (FMi)
71 listings.sty    2004/10/17 1.3b (Carsten Heinz)
   lstpatch.sty   2004/10/17 1.3b (Carsten Heinz)
73 lstmisc.sty     2004/09/07 1.3 (Carsten Heinz)
   listings.cfg   2004/09/05 1.3 listings configuration
75 lstlang1.sty    2004/09/05 1.3 listings language file
   lstlang1.sty   2004/09/05 1.3 listings language file
77 upquote.sty     2003/08/11 v1.1 Covington's upright-quote modification to verba
   tim and verb
79 textcomp.sty    2005/09/27 v1.99g Standard LaTeX package
   ts1enc.def     2001/06/05 v3.0e (jk/car/fm) Standard LaTeX file
81 ts1cmr.fd       1999/05/25 v2.5h Standard LaTeX font definitions
   t1phv.fd       2001/06/04 scalable font definitions for T1/phv.
83 supp-pdf.tex
   ragged2e.sty   2003/03/25 v2.04 ragged2e Package (MS)
85 everysel.sty   1999/06/08 v1.03 EverySelectfont Package (MS)
   nameref.sty    2006/12/27 v2.28 Cross-referencing by name of section
87 refcount.sty   2006/02/20 v3.0 Data extraction from references (HO)
   hic-manual_base.out
89 hic-manual_base.out
   ot1pplx.fd     2004/09/06 font definitions for OT1/pplx.
91 omlzplm.fd      2002/09/08 Fontinst v1.914 font definitions for OML/zplm.
   omszplm.fd     2002/09/08 Fontinst v1.914 font definitions for OMS/zplm.
93 omxzplm.fd     2002/09/08 Fontinst v1.914 font definitions for OMX/zplm.
   ot1zplm.fd     2002/09/08 Fontinst v1.914 font definitions for OT1/zplm.
95 figure/NYU_Langone.jpg
   child/Introduction/install-setup-run.tex
97 t1cmtt.fd       1999/05/25 v2.5h Standard LaTeX font definitions
   figure/sample_sheet_screenshot.png
99 child/Introduction/dependencies.tex
   child/default-pipeline-components.tex
101 ts1phv.fd       2001/06/04 scalable font definitions for TS1/phv.
   child/code-structure.tex
103 child/auto_report.tex
   child/custom_pipeline_step.tex
105 child/HiC/index.tex
   child/HiC/align.tex
107 child/HiC/filter.tex
   child/HiC/filter-stats.tex
109 figure/filter-stats_counts.pdf
   figure/filter-stats_percent.pdf
111 child/HiC/tracks.tex
   child/HiC/matrix-filtered.tex
113 child/HiC/matrix-prep.tex

```

```
child/HiC/matrix-ic.tex
115 child/HiC/matrix-hicnorm.tex
child/HiC/matrix-stats.tex
117 figure/matrix-stats_stats.pdf
child/HiC/compare-matrices.tex
119 child/HiC/compare-matrices-stats.tex
figure/compare-matrices-stats_correlograms.pdf
121 figure/compare-matrices-stats_pearson_correlograms.pdf
child/HiC/boundary-scores.tex
123 child/HiC/boundary-scores-pca.tex
figure/boundary-scores-pca_pca_DI_k_001.pdf
125 child/HiC/domains.tex
child/HiC/compare-boundaries.tex
127 child/HiC/compare-boundaries-stats.tex
figure/compare-boundaries-stats_raw_comparisons.pdf
129 figure/compare-boundaries-stats_correlograms.pdf
child/HiC/hicplotter.tex
131 figure/hicplotter_chr8-125000000-133000000.pdf
child/HiC/interactions.tex
133 figure/interactions_plots.pdf
child/HiC/annotations.tex
135 child/HiC/annotations-stats.tex
figure/annotations-stats_enrichment.pdf
137 child/Appendix/appendix.tex
ts1cmtt.fd 1999/05/25 v2.5h Standard LaTeX font definitions
139
```
