# Supplementary material for: HiC-bench: comprehensive and reproducible Hi-C data analysis designed for parameter exploration and benchmarking
Source: PubMed Central journal article supplement (PMC5217551; doi:10.1186/s12864-016-3387-6), 2017-01-05

Filtered

IC

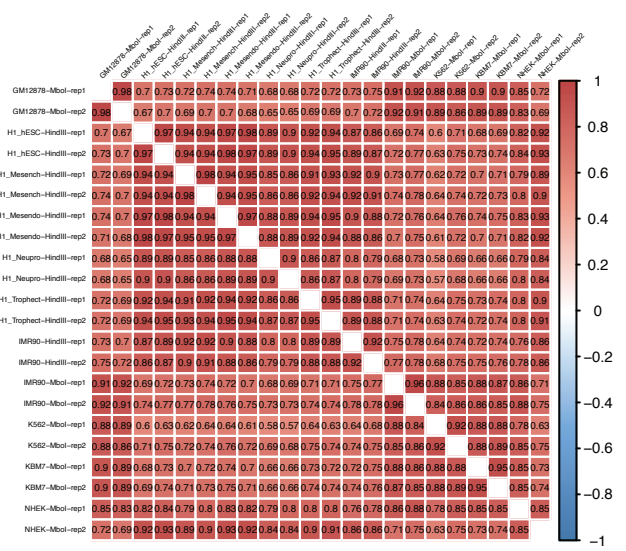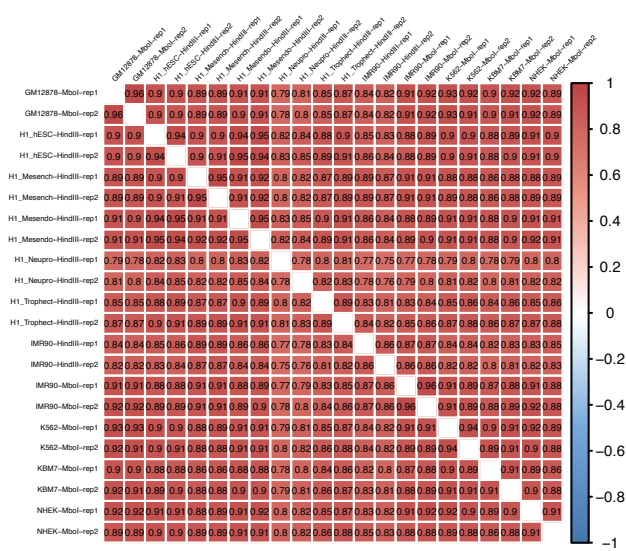

Supplement: 12864_2016_3387_MOESM6_ESM.pdf [file 12864_2016_3387_MOESM6_ESM.pdf]
